# Supplementary material for: Silent cerebral infarction and cognitive function following TAVI: an observational two-centre UK comparison of the first-generation CoreValve and second-generation Lotus valve
Source: PubMed Central journal article supplement — BMJ Open. 2019 Jan 21;9(1):e022329. doi: 10.1136/bmjopen-2018-022329 (PMC6347912; doi:10.1136/bmjopen-2018-022329), 2019-01-21
Supplement: bmjopen-2018-022329.draft_revisions.pdf [file bmjopen-2018-022329.draft_revisions.pdf]

# BMJ Open

BMJ Open is committed to open peer review. As part of this commitment we make the peer review history of every article we publish publicly available.

When an article is published we post the peer reviewers' comments and the authors' responses online. We also post the versions of the paper that were used during peer review. These are the versions that the peer review comments apply to.

The versions of the paper that follow are the versions that were submitted during the peer review process. They are not the versions of record or the final published versions. They should not be cited or distributed as the published version of this manuscript.

BMJ Open is an open access journal and the full, final, typeset and author-corrected version of record of the manuscript is available on our site with no access controls, subscription charges or pay-per-view fees (<http://bmjopen.bmj.com>).

If you have any questions on BMJ Open's open peer review process please email [info.bmjopen@bmj.com](mailto:info.bmjopen@bmj.com)

# BMJ Open

## Silent Cerebral Infarction and Cognitive Function following TAVI: a comparison of the 1st generation CoreValve and 2nd generation Lotus valve

|                               |                                                                                                                                                                                                                                                                                                                                                                                                                                                                                                                                                                                                                                                                                                                                                                                                                                                                                                                                                                                                                                                                           |
|-------------------------------|---------------------------------------------------------------------------------------------------------------------------------------------------------------------------------------------------------------------------------------------------------------------------------------------------------------------------------------------------------------------------------------------------------------------------------------------------------------------------------------------------------------------------------------------------------------------------------------------------------------------------------------------------------------------------------------------------------------------------------------------------------------------------------------------------------------------------------------------------------------------------------------------------------------------------------------------------------------------------------------------------------------------------------------------------------------------------|
| Journal:                      | <i>BMJ Open</i>                                                                                                                                                                                                                                                                                                                                                                                                                                                                                                                                                                                                                                                                                                                                                                                                                                                                                                                                                                                                                                                           |
| Manuscript ID                 | bmjopen-2018-022329                                                                                                                                                                                                                                                                                                                                                                                                                                                                                                                                                                                                                                                                                                                                                                                                                                                                                                                                                                                                                                                       |
| Article Type:                 | Research                                                                                                                                                                                                                                                                                                                                                                                                                                                                                                                                                                                                                                                                                                                                                                                                                                                                                                                                                                                                                                                                  |
| Date Submitted by the Author: | 14-Feb-2018                                                                                                                                                                                                                                                                                                                                                                                                                                                                                                                                                                                                                                                                                                                                                                                                                                                                                                                                                                                                                                                               |
| Complete List of Authors:     | <p>Musa, Tarique; University of Leeds, LICAMM<br/> Uddin, Akhlaque; University of Leeds, Multidisciplinary Cardiovascular Research Centre &amp; The Division of Cardiovascular and Diabetes Research<br/> Loveday, Catherine; University of Westminster, Cognitive Science Research Unit<br/> Dobson, Laura; University of Leeds, LICAMM<br/> Igra, Mark; Leeds Teaching Hospitals NHS Trust<br/> Richards, Fiona; University of Leeds<br/> Swoboda, Peter; University of Leeds, LICAMM<br/> Singh, Anvesha; University of Leicester<br/> Garg, Pankaj; University of Leeds, LICAMM<br/> Foley, James; University of Leeds, LICAMM<br/> Fent, Graham; University of Leeds, LICAMM<br/> Goddard, Anthony; Leeds Teaching Hospitals NHS Trust<br/> Malkin, Christopher; Leeds Teaching Hospitals NHS Trust<br/> Plein, Sven<br/> Blackman, Daniel; Leeds Teaching Hospitals NHS Trust<br/> McCann, G; University of Leicester,<br/> Greenwood, John; Leeds General Infirmary, Cardiology; University of Leeds, Leeds Institute of Cardiovascular and Metabolic Medicine</p> |
| Keywords:                     | Transcatheter Aortic Valve Implantation, Cerebral MRI, Neurocognitive Function, Boston Lotus, Medtronic CoreValve                                                                                                                                                                                                                                                                                                                                                                                                                                                                                                                                                                                                                                                                                                                                                                                                                                                                                                                                                         |
|                               |                                                                                                                                                                                                                                                                                                                                                                                                                                                                                                                                                                                                                                                                                                                                                                                                                                                                                                                                                                                                                                                                           |

SCHOLARONE™  
Manuscripts

**Silent Cerebral Infarction and Cognitive Function following TAVI:  
a comparison of the 1<sup>st</sup> generation CoreValve and 2<sup>nd</sup> generation Lotus valve**

|                                                    |                                                                              |
|----------------------------------------------------|------------------------------------------------------------------------------|
| Dr Tarique Al Musa, BSc MBBS <sup>1</sup>          | <a href="mailto:t.a.musa@leeds.ac.uk">t.a.musa@leeds.ac.uk</a>               |
| Dr Akhlaque Uddin, BSc MBChB <sup>1</sup>          | <a href="mailto:a.uddin@leeds.ac.uk">a.uddin@leeds.ac.uk</a>                 |
| Dr Catherine Loveday PhD <sup>2</sup>              | <a href="mailto:C.Loveday@westminster.ac.uk">C.Loveday@westminster.ac.uk</a> |
| Dr Laura E. Dobson, MBChB MD <sup>1</sup>          | <a href="mailto:l.dobson@leeds.ac.uk">l.dobson@leeds.ac.uk</a>               |
| Dr Mark Igra, MD <sup>3</sup>                      | <a href="mailto:drmarkigra@gmail.com">drmarkigra@gmail.com</a>               |
| Mrs Fiona Richards, RN <sup>1</sup>                | <a href="mailto:f.richards@leeds.ac.uk">f.richards@leeds.ac.uk</a>           |
| Dr Peter P. Swoboda, MBBS PhD <sup>1</sup>         | <a href="mailto:p.swoboda@leeds.ac.uk">p.swoboda@leeds.ac.uk</a>             |
| Dr Anvesha Singh, MBChB <sup>4</sup>               | <a href="mailto:as707@leicester.ac.uk">as707@leicester.ac.uk</a>             |
| Dr Pankaj Garg, MBBS <sup>1</sup>                  | <a href="mailto:p.garg@leeds.ac.uk">p.garg@leeds.ac.uk</a>                   |
| Dr James R.J. Foley, BSc MBChB <sup>1</sup>        | <a href="mailto:j.foley@leeds.ac.uk">j.foley@leeds.ac.uk</a>                 |
| Dr Graham J. Fent, BSc MBChB <sup>1</sup>          | <a href="mailto:g.j.fent@leeds.ac.uk">g.j.fent@leeds.ac.uk</a>               |
| Dr Anthony J.P. Goddard, FRCR <sup>3</sup>         | <a href="mailto:tony.goddard1@nhs.net">tony.goddard1@nhs.net</a>             |
| Dr Christopher Malkin, MD <sup>3</sup>             | <a href="mailto:christopher.malkin@nhs.net">christopher.malkin@nhs.net</a>   |
| Prof. Sven Plein, MD, PhD <sup>1,3</sup>           | <a href="mailto:s.plein@leeds.ac.uk">s.plein@leeds.ac.uk</a>                 |
| Dr Daniel J. Blackman, MD <sup>3</sup>             | <a href="mailto:daniel.blackman1@nhs.net">daniel.blackman1@nhs.net</a>       |
| Prof. Gerald P McCann, BSc MBChB, MD <sup>4</sup>  | <a href="mailto:gpm12@le.ac.uk">gpm12@le.ac.uk</a>                           |
| Prof. John P. Greenwood, MBChB, PhD <sup>1,3</sup> | <a href="mailto:j.greenwood@leeds.ac.uk">j.greenwood@leeds.ac.uk</a>         |

<sup>1</sup>Multidisciplinary Cardiovascular Research Centre & The Division of Biomedical Imaging, Leeds Institute for Cardiovascular and Metabolic Medicine, University of Leeds, Leeds, UK.

<sup>2</sup>Cognitive Science Research Unit, University of Westminster, London, UK

<sup>3</sup>Leeds Teaching Hospitals NHS Trust, Leeds General Infirmary, Leeds, UK.

<sup>4</sup>Department of Cardiovascular Sciences, University of Leicester, BHF Cardiovascular Research Centre, and the National Institute of Health Research (NIHR) Cardiovascular Biomedical Research Unit, Glenfield Hospital, Leicester, UK.

1  
2  
3 **Short title:** Silent cerebral injury: CoreValve Vs. Lotus  
4  
5

6  
7 **Correspondence:**

8 Professor J.P. Greenwood

9  
10 Multidisciplinary Cardiovascular Research Centre,

11  
12 Leeds Institute for Cardiovascular and Metabolic Medicine,

13  
14 University of Leeds, LS2 9JT, UK

15  
16 Tel +44 113 39 22650 Fax +44 113 3922311 Email: [j.greenwood@leeds.ac.uk](mailto:j.greenwood@leeds.ac.uk)  
17  
18  
19

20 **Word count:**

21  
22 **4,816 (including references)**

23  
24 **2,924 (excluding references)**  
25  
26  
27  
28  
29  
30  
31  
32  
33  
34  
35  
36  
37  
38  
39  
40  
41  
42  
43  
44  
45  
46  
47  
48  
49  
50  
51  
52  
53  
54  
55  
56  
57  
58  
59  
60

**ABSTRACT**

**Objective:** To compare the incidence of silent cerebral infarction and impact upon cognitive function following Transcatheter Aortic Valve Implantation (TAVI) with the first-generation CoreValve (Medtronic, Minneapolis, Minnesota) and second-generation Lotus valve (Boston Scientific, Natick Massachusetts).

**Design:** A prospective observational study comprising a 1.5 T cerebral MRI scan, performed preoperatively and immediately following TAVI, and neurocognitive assessments performed at baseline, 30 days and 1-year follow-up.

**Setting:** University hospitals of Leeds and Leicester, UK.

**Patients:** 66 (80.6±8.0 years, 47% male) high-risk severe symptomatic aortic stenosis patients recruited between April 2012 to May 2015.

**Main outcome measures:** Incidence of new cerebral microinfarction and objective decline in neurocognitive performance.

**Results:** All underwent cerebral MRI at baseline and immediately following TAVI, and 49 (25 Lotus, 24 CoreValve) completed neurocognitive assessments at baseline, 30 days and 1 year. There was a significantly greater incidence in new cerebral micro-infarction observed following the Lotus TAVI (23(79%) vs 22(59%),  $p=0.025$ ) with a greater number of new infarcts per patient (median 3.5 (IQR 7.0) vs. 2.0 (IQR 3.0),  $p=0.002$ ). The mean volume of infarcted cerebral tissue per patient was equivalent following the two prostheses ( $p=0.166$ ). More patients suffered new anterior (14(48%) vs. 2(5%),  $p=0.001$ ) and vertebrobasilar (15(52%) vs. 7(19%),  $p=0.005$ ) lesions following Lotus. Lotus was associated with a decline in verbal memory and psychomotor speed at 30 days. However, performance longitudinally at one year was preserved in all neurocognitive domains.

**Conclusions:** There was a higher incidence of silent cerebral micro-infarction and a greater number of lesions per patient following Lotus compared to CoreValve. However, there was no objective decline in neurocognitive function discernible at 1-year following TAVI with either prosthesis.

## Article Summary

Before the use of Transcatheter Aortic Valve Implantation can be extended to younger clinical groups, the association with silent cerebral infarction and impact upon neurocognitive function must be further understood. We sought to define the profiles of cerebral injury following TAVI with the novel Boston Lotus iteration and the first-generation Medtronic CoreValve.

## Strengths and Limitations of this Study

- Contemporary study comprising both a novel TAVI design technology and an established device.
- A two-centre study combining both DW-MRI and cognitive assessments to comprehensively assess cerebral injury following TAVI.
- Mid-term follow-up to 1 year
- Not randomised.
- Higher field strength MRI available for more sensitive detection of cerebral embolic infarction.

**KEYWORDS:** Transcatheter Aortic Valve Implantation, Medtronic CoreValve, Boston Lotus Valve, Cerebral MRI, Neurocognitive function

## Abbreviations list

|         |                                               |
|---------|-----------------------------------------------|
| BAV:    | balloon aortic valvuloplasty                  |
| CABG:   | coronary artery bypass grafting               |
| DSST:   | digit symbol substitution test                |
| DW-MRI: | diffusion weighted magnetic resonance imaging |
| eGFR    | estimated glomerular filtration rate          |
| GPBT:   | grooved pegboard test                         |
| HVLT:   | Hopkins verbal learning test                  |
| IQ:     | intelligent quotient                          |
| LNS:    | letter number sequencing                      |
| MDCT:   | multi detector computed tomography            |
| MI:     | myocardial infarction                         |
| MMSE:   | mini mental state examination                 |
| PCI:    | percutaneous coronary intervention            |

1  
2  
3  
4  
5  
6  
7  
8  
9  
10  
11  
12  
13  
14  
15  
16  
17  
18  
19  
20  
21  
22  
23  
24  
25  
26  
27  
28  
29  
30  
31  
32  
33  
34  
35  
36  
37  
38  
39  
40  
41  
42  
43  
44  
45  
46  
47  
48  
49  
50  
51  
52  
53  
54  
55  
56  
57  
58  
59  
60

SD: standard deviation  
STS: Society of Thoracic Surgeons  
TAVI: transcatheter aortic valve implantation  
TMT: trail making test  
VARC: valve academic research consortium

For peer review only

## INTRODUCTION

Transcatheter aortic valve implantation (TAVI) is advocated by both European<sup>1</sup> and US<sup>2</sup> guidance in patients with symptomatic aortic stenosis deemed inoperable or with too high a predicted postoperative mortality. TAVI is cost-effective<sup>3</sup>, significantly improves quality of life<sup>4</sup>, and recent trial data suggest non-inferior to surgery in intermediate-risk patients<sup>5</sup>, potentially expanding its application to a broader population.

However, since the landmark PARTNER trial in 2010<sup>6</sup>, the inherent risk of disabling stroke associated with TAVI has been well recognised. Despite 10 years of refinement in transcatheter technology and delivery technique, stroke rates remain similar<sup>7</sup>. Importantly, TAVI is also associated with a high incidence (up to 84%) of silent cerebral embolism as detected by diffusion-weighted MRI (DW-MRI)<sup>8-10</sup>; more frequent than that following aortic valve surgery<sup>11</sup>.

The association of new DW-MRI lesions post-TAVI with cognitive decline is an issue currently under intense scrutiny, as it has long been recognised that silent cerebral infarcts can more than double the risk of dementia<sup>12</sup>. Indeed the concept of post-operative cognitive dysfunction and its relationship with DW-MRI has been described following valvular surgery, bypass grafting and left heart catheterization<sup>13</sup>.

The Boston Scientific Lotus valve is a novel TAVI iteration that incorporates a number of features specifically designed to improve upon first-generation devices<sup>14</sup>. As such it exhibits superior deployment success rates when compared to the older Medtronic CoreValve<sup>15</sup>. However, the key concern of silent cerebral injury following implantation and cognitive decline remains unanswered. We sought to characterise the extent of new silent cerebral infarction using DW-MRI, and investigate



1  
2  
3 longitudinally cognitive function following TAVI with the first generation self-  
4 expanding Medtronic CoreValve and the second-generation mechanically-expanded  
5 Boston Scientific Lotus valve.  
6  
7  
8  
9

## 10 **METHODS**

### 11 **Patient selection**

12  
13 This study prospectively recruited 74 patients with severe degenerative AS from two  
14 large UK tertiary cardiothoracic centres (Leeds and Leicester) who were referred for  
15 TAVI between April 2012 and May 2015. Severe AS was classified by  
16 echocardiography as an aortic valve area of  $\leq 1.0\text{cm}^2$  or peak velocity  $>4\text{m/s}$ . The  
17 decision for TAVI in all cases was taken by a multidisciplinary heart team in  
18 accordance with international guidance<sup>16</sup>. Exclusion criteria included any  
19 contraindication to MRI or pre-existing severe cognitive impairment (a mini-mental  
20 state examination (MMSE) score  $<10$ ). Any patient deemed to exhibit new focal  
21 neurological dysfunction consistent with clinical stroke post-TAVI was also excluded.  
22  
23 The study was approved by the National Research Ethics Service (08/H1307/106),  
24 complied with the Declaration of Helsinki and all patients provided written informed  
25 consent.  
26  
27  
28  
29  
30  
31  
32  
33  
34  
35  
36  
37  
38  
39

### 40 **Transcatheter Aortic Valve Implantation**

41 TAVI was performed using either a first-generation CoreValve system (Medtronic,  
42 Minneapolis, Minnesota, USA) or the Lotus™ Aortic Valve system (Boston Scientific  
43 Corporation, Natick, MA, USA) employing standard techniques as previously  
44 described for both vendors<sup>17,18</sup>. Multidetector computed tomography (MDCT) was  
45 employed to assist annular sizing and assess aortic calcification prior to TAVI.  
46 Percutaneous femoral artery access was the default approach. Balloon  
47 valvuloplasty, rapid ventricular pacing and post-dilatation (in the case of CoreValve)  
48  
49  
50  
51  
52  
53  
54  
55  
56  
57  
58  
59  
60

1  
2  
3 were employed at the discretion of the operator. All patients received weight-  
4 adjusted unfractionated heparin to maintain an activated clotting time >200s and  
5 were treated with dual antiplatelet therapy (aspirin 75mg and clopidogrel 75mg) for a  
6 minimum of 3 months. None of the TAVI cases involved the use of a cerebral  
7 protection device.  
8  
9  
10  
11  
12

### 13 **Neurocognitive assessment**

14  
15 The neurocognitive test battery was performed by trained assessors  
16 (medical/nursing) in a quiet comfortable environment at three Valve Academic  
17 Research Consortium (VARC) recommended time points (baseline, 30d and 12m)<sup>19</sup>.  
18 Training of assessors and performance validation was undertaken by an  
19 experienced neuropsychologist (CL). Follow-up assessment was conducted at the  
20 patient home or the hospital. Total assessment time ranged between 60-90min with  
21 appropriate rest periods. Baseline characteristics, patient handedness and years of  
22 education were recorded. The national adult reading test (NART) was used to  
23 calculate the full scale intelligent quotient (FSIQ=123.2-(1.029 x NART error score)).  
24 A broad battery of previously validated neurocognitive assessments were  
25 undertaken at the designated time points<sup>20</sup> and included evaluation of: *cognitive*  
26 *reasoning*: using the mini mental state examination (MMSE), *verbal memory*: using  
27 the Hopkins Verbal Learning Tests (HVLT), *executive function*: using the Letter  
28 Number Sequencing task (LNS), *psycho-motor speed*: using the Trail Making Test  
29 (TMT) A and B, *perceptual and visual memory*: using the Digit-Symbol Substitution  
30 Test (DSST), and *fine motor co-ordination and speed*: using the Grooved Pegboard  
31 Test (GPBT - Model 32025, Lafayette Instruments Co, IN, USA). Cognitive decline  
32 was defined as a reduction of the score by 1 SD of the baseline score for all tests<sup>21-</sup>  
33  
34  
35  
36  
37  
38  
39  
40  
41  
42  
43  
44  
45  
46  
47  
48  
49  
50  
51  
52  
53

54 23  
55  
56  
57  
58  
59  
60

### Cerebral MRI

Cerebral MRI was conducted pre- and post-procedure (within 7d) using identical imaging protocols. MRI was performed on the same 1.5T system for all serial scans for any individual patient (Intera, Phillips Healthcare, Best, The Netherlands or Avanto, Siemens Medical Systems, Erlangen, Germany). The imaging protocol consisted of T2 weighted fast field echo, T2 turbo field echo and diffusion weighted imaging (DWI) (22 slices, 5mm thick, 1mm gap, FOV 350, RFOV 100). Each scan was independently assessed by two experienced Neuroradiologists (AG, MI), blinded to all clinical/procedural details. Cerebral embolism or micro-infarction was defined as a new restricted diffusion lesion on DWI. New cerebral micro-infarcts were localised to one hemisphere and vascular territory. Infarct diameter was used to categorise patients into small or large lesion sub-groups (<5mm or >5mm; in the case of multiple lesions the largest lesion was used to determine status). The total infarct volume (ml) was measured off-line using standard post-processing software (QMass 7.2, Medis, The Netherlands) as previously published<sup>10,11</sup>.

**Statistical Analysis** Data was tested for normality using the Shapiro-Wilks test. Continuous variables were expressed as mean±SD or median (Q2-Q3 or IQR) and were tested for differences by means of a 2-sided, unpaired Student t test (for comparison between groups) or a 2-sided, paired Student t test (for intra-group comparison). Non-parametric testing (Mann–Whitney test) was performed where indicated. Categorical variables were given as frequencies and percentages and compared by  $\chi^2$  statistics or Fisher exact test. All statistical analyses were performed using the PASW software package (V.21.0 SPSS, IBM, Chicago, Illinois, USA) with a two-sided significance level of  $p < 0.05$  was considered statistically significant. Sample size to detect cognitive decline (reduction in score by 1SD) was estimated using *IBM*

1  
2  
3 *SPSS Sample power version 3*, and using normative data for the test to have 80%  
4  
5 power ( $\alpha$  0.05), a minimum of 17 patients were required in each group.  
6

## 7 **RESULTS**

### 8 **Patient population**

9  
10 A total of 66 patients (37 Medtronic CoreValve and 29 Boston Lotus) underwent both  
11  
12 the pre-operative (median 1 day pre-procedure, IQR 14 days) and immediate post-  
13  
14 TAVI MRI scans (median 4 days, IQR 4 days). The baseline characteristics of these  
15  
16 groups are shown in Table 1. Forty-nine of these (24 CoreValve and 25 Lotus)  
17  
18 completed serial neurocognitive assessments out to 12 months. Reasons for non-  
19  
20 completion were varied reflecting an elderly frail population (Figure 1).  
21  
22

### 23 **Patient Involvement**

24  
25 Patients were not involved with the study design, recruitment, conduct or  
26  
27 interpretation of results obtained. Outcome measures were objectively measured  
28  
29 and not based on patient experience.  
30  
31

### 32 **Procedural data**

33  
34 TAVI was successful in all cases. Catheterization data for the TAVI implant  
35  
36 procedures is summarised in Table 2. Of the 29 Lotus implants, 7(24%) involved  
37  
38 device repositioning. Of the CoreValve implants, there were three instances of  
39  
40 embolization and the requirement of a second valve in three cases (two of whom  
41  
42 were due to embolization).  
43  
44

### 45 **Cerebral MRI**

46  
47 Typical cerebral DWI images at baseline and immediately after TAVI are depicted in  
48  
49 Figures 2A and 2B respectively.  
50

51 *Baseline:* At baseline, 5(17%) of the Lotus patients and 10(27%) of the CoreValve  
52  
53 patients had evidence of pre-existing established stroke ( $p=0.346$ ) with equivalent  
54  
55 lesion volume ( $p=0.529$ ). There was also evidence of recent micro-infarction on  
56  
57  
58  
59  
60

1  
2  
3 cerebral DWI in 2(7%) Lotus and 4(11%) CoreValve patients ( $p=0.583$ ). A greater  
4  
5 proportion of patients undergoing Lotus TAVI had evidence of periventricular  
6  
7 ischaemia compared to those undergoing CoreValve (19(66%) vs. 14(38%),  
8  
9  $p=0.026$ ).

11 *Post-procedure:* Table 3 summarises the findings of DWI imaging following TAVI.  
12  
13 There was a significantly greater incidence in new micro-infarction observed  
14  
15 following Lotus TAVI with a greater number of new infarcts per patient. These were  
16  
17 predominantly of small size, with a comparable mean infarcted cerebral tissue  
18  
19 volume per patient with both TAVI designs. More patients suffered new anterior and  
20  
21 vertebro-basilar lesions following Lotus than CoreValve. The number of new lesions  
22  
23 following Lotus repositioning ( $n=7$ ) and non-repositioning ( $n=22$ ) did not differ (1.0  
24  
25 (IQR 8.0) vs. 3.0 (IQR 3.75),  $p=0.438$ ) and Lotus repositioning did not correlate with  
26  
27 number of new lesions ( $p=0.435$ ). For the CoreValve group, the three patients in  
28  
29 whom embolization occurred had significantly greater frequency of new lesions post-  
30  
31 procedure (4.0 (IQR 0.0) vs. 1.0 (IQR 2.0),  $p=0.011$ ), but no difference was seen in  
32  
33 the three requiring a second valve (4.0 (IQR 0.0) vs. 1.0 (IQR 2.0),  $p=0.148$ ). Typical  
34  
35 findings of new cerebral infarction detected by DW-MRI post-TAVI are exemplified in  
36  
37 Figure 2.

#### 41 **Baseline education and intelligence**

42  
43 The vast majority of patients were right handed (CoreValve: 21(88%) vs. Lotus:  
44  
45 24(96%),  $p=0.234$ ) with equivalent reporting of disability on Modified Rankin Scale  
46  
47 (CoreValve:  $1.9\pm 1.1$  vs. Lotus:  $2.0\pm 0.7$ ,  $p=0.929$ ). The CoreValve and Lotus patients  
48  
49 were similar in respect of years in education ( $10.9\pm 1.9$  vs.  $11.6\pm 2.5$  yrs,  $p=0.279$ ),  
50  
51 and full scale IQ ( $106\pm 12$  vs.  $102\pm 15$ ,  $p=0.313$ ). Global cognition measured using the  
52  
53 MMSE was also equivalent ( $28.8\pm 1.8$  vs.  $28.6\pm 1.6$ ,  $p=0.279$ ) with only 1 patient from  
54  
55  
56  
57  
58  
59  
60

1  
2  
3 the Lotus group indicating cognitive impairment (defined as an MMSE of less than  
4  
5 24<sup>24</sup>).

### 7 **Effect of TAVI design on absolute neurocognitive function scores**

8  
9 Neurocognitive performance, prior to and following Lotus and CoreValve TAVI, are  
10  
11 shown in Table 4. For the vast majority of domains, including global cognition,  
12  
13 psychomotor speed, executive function and fine motor co-ordination, no change in  
14  
15 test scores were observed at 30 days or 12 months following TAVI, with either the  
16  
17 Lotus or CoreValve prostheses.

18  
19 The HVLIT was utilised to test mnemonic function and verbal memory, and total  
20  
21 learning scores remained unchanged over time for both CoreValve and Lotus.  
22  
23 However, delayed recall scores and discrimination index were significantly lower at  
24  
25 30 days following Lotus (Table 4), with 12 month scores returning to baseline level  
26  
27 (delayed recall: 7.6±3.0 vs. 9.0±6.7, p=0.320, discrimination index: 10.2±1.5 vs.  
28  
29 10.1±2.4, p=0.867), with no change observed following CoreValve.

30  
31 The TMT assesses executive function and psychomotor speed, with TMT A  
32  
33 preceding the more challenging TMT B. The TMT B scores were significantly lower  
34  
35 at 30 days following Lotus (Table 4), with 12 month scores again returning to  
36  
37 baseline level (170.9±86.5 vs. 152.3±87.5, p=0.215), with no change observed  
38  
39 following CoreValve at any time point.

### 40 **Presence or absence of DW-MRI lesions**

41  
42 At one-year follow-up, for each TAVI prosthesis we sought to compare individuals  
43  
44 with and without DW-MRI lesions in respect of neurocognitive performance (Table  
45  
46 5). Of the 25 Lotus patients that completed 12 month assessments, 19(76%)  
47  
48 exhibited new DW-MRI lesions post-TAVI, and of the 24 CoreValve patients,  
49  
50 13(54%) were DW-MRI positive (p=0.140). Lotus patients with DW-MRI lesions  
51  
52  
53  
54  
55  
56  
57  
58  
59  
60

1  
2  
3 exhibited an overall decline in global cognition (MMSE) at 12 months compared to  
4 those without (Figure 3A and B). CoreValve patients with DW-MRI lesions had a  
5 significantly lower HVLT discrimination index at 12 months compared to those  
6 without (Figure 3C and D). For all of the remaining neurocognitive domains, no  
7 difference in performance at 1 year was noted between patients with and without  
8 DW-MRI lesions for either TAVI prosthesis.  
9  
10  
11  
12  
13  
14

## 15 **DISCUSSION**

16  
17 This two-centre study is the first to use DW-MRI and cognitive assessments to  
18 comprehensively compare two first- and second-generation TAVI devices. This study  
19 provides several new insights: 1) there was a high occurrence of silent cerebral  
20 embolism during TAVI affecting both first- and second-generation prosthesis designs  
21 (with 66% of the total study population exhibiting new DW-MRI lesions post-TAVI); 2)  
22 the Lotus valve exhibited a significantly higher incidence of new DW-MRI micro-  
23 infarcts, with more than twice the number of lesions per patient than observed  
24 following CoreValve; 3) DW-MRI lesions are of similar size, but more frequently  
25 observed in the anterior cerebral and vertebro-basilar territories following Lotus  
26 compared with CoreValve; 4) despite a higher DW-MRI burden and an initial  
27 deterioration in verbal memory following Lotus, TAVI does not appear detrimental to  
28 mid-term neurocognitive function, with 12 month scores in all domains being  
29 equivalent to baseline following both Lotus and CoreValve; 5) for the majority of  
30 domains, including executive function, psycho-motor speed, perceptual and visual  
31 memory and fine motor co-ordination and speed, the presence of DW-MRI lesions  
32 did not influence neurocognitive function at 1 year for either valve. This latter point is  
33 consistent with previous work that demonstrated preserved 2-year cognitive  
34 performance in an unselected TAVI population, irrespective of DW-MRI status<sup>22</sup>.  
35  
36  
37  
38  
39  
40  
41  
42  
43  
44  
45  
46  
47  
48  
49  
50  
51  
52  
53  
54  
55  
56  
57  
58  
59  
60

1  
2  
3 Cognitive decline after cardiac surgery is associated with increased morbidity and  
4 mortality<sup>25</sup> and has significant social and economic implications<sup>22</sup>. TAVI has  
5 revolutionised the management of high risk patients with symptomatic aortic stenosis  
6 worldwide. However, determining whether the high incidence of silent DW-MRI  
7 lesions seen post-TAVI predisposes to cognitive decline, and whether TAVI design  
8 has any impact upon this, remains a crucial pre-requisite to its more widespread use.  
9  
10 Despite its advanced design, our study suggests that the use of the second-  
11 generation Lotus valve carries a higher risk of silent cerebral infarction, but without  
12 an objectively discernible decline in neurocognitive function at one year, comparable  
13 to the CoreValve prosthesis.  
14  
15

16  
17  
18  
19  
20  
21  
22  
23  
24  
25 The multiple and diffusely distributed silent cerebral lesions detected by DW-MRI  
26 post-TAVI are in keeping with an embolic aetiology. We have previously shown  
27 severity of aortic arch atheroma is an independent risk factor for the development of  
28 new cerebral infarcts following TAVI<sup>10</sup>. Transcranial Doppler studies, performed  
29 during TAVI, have indicated balloon valvuloplasty, prosthesis positioning and  
30 implantation as particular moments for cerebral embolization<sup>26</sup>, suggesting that  
31 manipulation of the native aortic valve is also an important source.  
32  
33  
34  
35  
36  
37  
38  
39

40  
41  
42  
43  
44  
45  
46  
47  
48  
49  
50  
51  
52  
53  
54  
55  
56  
57  
58  
59  
60  
Oversizing has been associated with tissue embolization on histopathological  
analysis<sup>27</sup> and is recommended to a degree with first-generation designs in order to  
prevent paravalvular regurgitation. The higher cover index and greater displacement  
forces upon degenerate native leaflets might consequently be expected to precipitate  
a greater degree of tissue dehiscence and embolization. Balloon post-dilatation has  
also been demonstrated to significantly predict acute neurological events<sup>7</sup>. Despite  
the larger valve size, greater frequency of valve embolization and use of post-  
dilatation, new DW-MRI lesions were less frequently seen following CoreValve. The



1  
2  
3 Lotus valve is fully repositionable, reflecting the longer fluoroscopy times observed  
4 with this prosthesis. However, our data suggests that repositioning per se was not a  
5 significant contributor to the frequency of new DW-MRI lesions observed. The Lotus  
6 delivery system typically requires 20F sheaths or wider, and thus greater endothelial  
7 disruption during manipulation around the aortic arch may underlie the higher  
8 incidence of cerebral micro-infarction seen after Lotus TAVI. Future studies are  
9 required to determine whether these findings may translate into variation in the  
10 incidence of clinical stroke.  
11  
12

13  
14 We and others have previously demonstrated the majority of DW-MRI lesions  
15 immediately post-TAVI appear to resolve by 6 months<sup>11</sup>. However, this resolution  
16 does not necessarily indicate tissue normalisation. The insensitivity of lower field  
17 strength imaging has been suggested as one explanation<sup>13</sup>. Furthermore, rat models  
18 of cerebral ischaemic insult confirm histological neuronal damage despite DW-MRI  
19 resolution, cautioning the use of imaging alone to assess ischaemic injury<sup>28</sup>. We  
20 therefore sought to compliment cerebral MR imaging with a battery of well validated  
21 neurocognitive assessment tools.  
22  
23

24  
25 There is a large body of evidence to indicate silent cerebral injury heralds adverse  
26 cognitive consequences. They are associated with an increased risk of mild cognitive  
27 impairment<sup>29</sup>, and may double the risk of dementia (most commonly Alzheimer's  
28 disease), with a steeper rate of cognitive decline observed the greater the number of  
29 infarctions<sup>12</sup>. It is feasible that the decline in verbal memory seen at 30 days  
30 following Lotus, which was not observed following CoreValve, is a reflection of the  
31 associated higher burden of DW-MRI lesions.  
32  
33

34  
35 To date, few studies have combined DW-MRI and cognitive assessment following  
36 TAVI with CoreValve or Edwards-Sapien. The largest involved 111 subjects<sup>22</sup> with  
37  
38  
39  
40  
41  
42  
43  
44  
45  
46  
47  
48  
49  
50  
51  
52  
53  
54  
55  
56  
57  
58  
59  
60

1  
2  
3 the other three averaging 40 patients<sup>8,21,30</sup>. No decline in any cognitive domain was  
4  
5 observed despite the occurrence of diffuse micro-infarcts affecting both cerebral  
6  
7 hemispheres<sup>21</sup>; and patients with and without DW-MRI lesions performed equally  
8  
9 well<sup>22</sup>. These findings are consistent with our study. Our observed high incidence of  
10  
11 new DW-MRI lesions post-TAVI appeared to lack clinical sequelae when cognition  
12  
13 was objectively assessed at 12 months, and this was the case following both first  
14  
15 and second-generation devices.  
16

17  
18 This study is noteworthy in the context of contemporary TAVI trials. Results from the  
19  
20 PARTNER 2 trial have suggested transfemoral TAVI results in a lower rate of death  
21  
22 or disabling stroke in intermediate-risk patients, with an average age similar to this  
23  
24 study of 81.5 years, when compared with surgery<sup>31</sup>. Younger patients would  
25  
26 expectedly exhibit lower burdens of aortic atheroma and thus fewer silent DW-MRI  
27  
28 lesions, irrespective of TAVI design. In the recent CLEAN-TAVI<sup>32</sup> and SENTINEL<sup>33</sup>  
29  
30 trials, cerebral protection reduced new ischaemic cerebral lesions. However, Lotus  
31  
32 patients were notably absent from both studies. Whilst pre-existing lesion volume  
33  
34 predicted future cerebral lesion volume<sup>33</sup>, the baseline and post-TAVR volume of  
35  
36 established DWI lesions in our study of both CoreValve and Lotus were equivalent.  
37  
38 Our work suggests devices to reduce lesion frequency maybe a particularly pertinent  
39  
40 adjunct to Lotus TAVI and potentially offset the decline in verbal memory and  
41  
42 psychomotor speed we observed at 30 days.  
43  
44

45  
46 Whilst our work indicates DW-MRI, our lesions does not seem to affect mid-term  
47  
48 neurocognitive function caution is required not to dismiss DW-MRI lesions as entirely  
49  
50 innocuous, particularly given even small lesions tripled the risk of stroke-related  
51  
52 death in healthy subjects aged 50 – 73 years over 14 years of follow-up<sup>34</sup>. Longer  
53  
54  
55  
56  
57  
58  
59  
60

1  
2  
3 follow-up is required to clinically appreciate the natural history of cerebral injury  
4  
5 incurred during TAVI.  
6

### 7 **Limitations**

8  
9  
10 Patients were not randomised to CoreValve or Lotus and hence the study is  
11  
12 vulnerable to selection bias. Furthermore, we have not directly compared cognitive  
13  
14 performance from our two TAVI groups with that of healthy octogenarians, or  
15  
16 patients managed conservatively.  
17

18  
19 There was attrition in patients completing the study protocol, with 5 patients failing to  
20  
21 complete post-intervention imaging and 17 patients with imaging data failing to  
22  
23 complete 12 month neurocognitive assessments. There is hence an inherent risk of  
24  
25 bias as potentially those with most marked decline in cognitive function might have  
26  
27 been excluded.  
28

29  
30 The CoreValve has been clinically in use for much longer than the Lotus valve.  
31  
32 Therefore, the greater degree of new DWI lesion seen in the Lotus group may partly  
33  
34 reflect an operator “learning curve” during which experience and fluency in use of  
35  
36 Lotus delivery equipment was refined.  
37

38  
39 Presently, there is no internationally accepted definition of cognitive decline following  
40  
41 cardiac procedures, with the potential for variation between studies. We have utilised  
42  
43 a comprehensive battery of validated tests that cover a wide variety of important  
44  
45 higher neurocognitive faculties, but potentially these may be insensitive to change  
46  
47 and lack validation in the context of TAVI.  
48  
49

50  
51 Our work employed 1.5 Tesla field strength imaging, which is the case for the  
52  
53 majority of similar published studies. However, the use of higher-field strengths may  
54  
55 have increased detection of micro-infarction and characterise more accurately the  
56  
57  
58  
59  
60

1  
2  
3 burden associated with different TAVI devices.  
4

## 5 **CONCLUSION**

6  
7  
8 There was a higher incidence of silent micro-infarction with a greater number of  
9 lesions per patient following second-generation Lotus compared to the first-  
10 generation CoreValve implantation. However, there was no objective decline in  
11 neurocognitive function discernible 1-year following TAVI with either prosthesis.  
12  
13  
14  
15

## 16 **FUNDING**

17  
18 This study was part-funded by the British Heart Foundation (PG/11/126/29321), an  
19 investigator research grant from Boston Scientific and also the National Institute for  
20 Health Research (NIHR) Leeds Clinical Research Facility. The views expressed are  
21 those of the author(s) and not necessarily those of the NHS, NIHR or the  
22 Department of Health. GPM is supported by an NIHR Clinical Research Fellowship.  
23  
24  
25  
26  
27  
28  
29  
30

## 31 **COMPETING INTERESTS**

32  
33  
34 DB and CJM are consultants and proctors for both Medtronic and Boston Scientific.  
35

36  
37 JPG and SP have received an educational research grant from Philips Healthcare.  
38  
39

## 40 **Author's Contribution**

41  
42  
43 JPG conceived and designed the study. TAM drafted the manuscript. CL compiled  
44 the comprehensive battery of neurocognitive tests and instructed on their correct  
45 implementation. FR, TAM, AU, LED and AS performed the recruitment of patients  
46 and their neurocognitive assessment. GPM supervised and AS oversaw the  
47 University of Leicester contribution. MI and AJPG performed MRI image analysis.  
48  
49  
50  
51  
52  
53  
54 DJB and CM carried out TAVI implantation. TAM and AU analysed data and  
55 interpreted the results. PPS and PG gave input into data interpretation. PPS, PG,  
56  
57  
58  
59  
60

JRJF, GJF, SP and GPM were involved in critical and intellectual revision of the article. All authors edited and revised the manuscript. All authors read and approved the final manuscript.

## REFERENCES

1. Joint Task Force on the Management of Valvular Heart Disease of the European Society of C, European Association for Cardio-Thoracic S, Vahanian A, Alfieri O, Andreotti F, Antunes MJ, Baron-Esquivias G, Baumgartner H, Borger MA, Carrel TP, De Bonis M, Evangelista A, Falk V, Iung B, Lancellotti P, Pierard L, Price S, Schafers HJ, Schuler G, Stepinska J, Swedberg K, Takkenberg J, Von Oppell UO, Windecker S, Zamorano JL, Zembala M. Guidelines on the management of valvular heart disease (version 2012). *European heart journal* 2012;33:2451-2496.
2. Nishimura RA, Otto CM, Bonow RO, Carabello BA, Erwin JP, 3rd, Guyton RA, O'Gara PT, Ruiz CE, Skubas NJ, Sorajja P, Sundt TM, 3rd, Thomas JD, American College of Cardiology/American Heart Association Task Force on Practice G. 2014 AHA/ACC guideline for the management of patients with valvular heart disease: executive summary: a report of the American College of Cardiology/American Heart Association Task Force on Practice Guidelines. *Journal of the American College of Cardiology* 2014;63:2438-2488.
3. Fairbairn TA, Meads DM, Hulme C, Mather AN, Plein S, Blackman DJ, Greenwood JP. The cost-effectiveness of transcatheter aortic valve implantation versus surgical aortic valve replacement in patients with severe aortic stenosis at high operative risk. *Heart* 2013;99:914-920.
4. Fairbairn TA, Meads DM, Mather AN, Motwani M, Pavitt S, Plein S, Blackman DJ, Greenwood JP. Serial change in health-related quality of life over 1 year after transcatheter aortic valve implantation: predictors of health outcomes. *Journal of the American College of Cardiology* 2012;59:1672-1680.
5. Leon MB, Smith CR, Mack MJ, Makkar RR, Svensson LG, Kodali SK, Thourani VH, Tuzcu EM, Miller DC, Herrmann HC, Doshi D, Cohen DJ, Pichard AD, Kapadia S, Dewey T, Babaliaros V, Szeto WY, Williams MR, Kereiakes D, Zajarias A, Greason KL, Whisenant BK, Hodson RW, Moses JW, Trento A, Brown DL, Fearon WF, Pibarot P, Hahn RT, Jaber WA, Anderson WN, Alu MC, Webb JG, Investigators P. Transcatheter or Surgical Aortic-Valve Replacement in Intermediate-Risk Patients. *The New England journal of medicine* 2016;374:1609-1620.
6. Leon MB, Smith CR, Mack M, Miller DC, Moses JW, Svensson LG, Tuzcu EM, Webb JG, Fontana GP, Makkar RR, Brown DL, Block PC, Guyton RA, Pichard AD, Bavaria JE, Herrmann HC, Douglas PS, Petersen JL, Akin JJ, Anderson WN, Wang D, Pocock S, Investigators PT. Transcatheter aortic-valve implantation for aortic stenosis in patients who cannot undergo surgery. *The New England journal of medicine* 2010;363:1597-1607.
7. Fearon WF, Kodali S, Doshi D, Fischbein MP, Yeung AC, Tuzcu EM, Rihal CS, Babaliaros V, Zajarias A, Herrmann HC, Brown DL, Mack M, Teirstein PS, Whisenant BK, Makkar R, Kapadia S, Leon MB, Investigators PT. Outcomes after transfemoral transcatheter aortic valve replacement: a comparison of the randomized PARTNER (Placement of AoRTic TraNscathetER Valves) trial with the NRCA (Nonrandomized Continued Access) registry. *JACC Cardiovascular interventions* 2014;7:1245-1251.
8. Kahlert P, Knipp SC, Schlamann M, Thielmann M, Al-Rashid F, Weber M, Johansson U, Wendt D, Jakob HG, Forsting M, Sack S, Erbel R, Eggebrecht H. Silent and apparent cerebral ischemia after percutaneous transfemoral aortic valve implantation: a diffusion-weighted magnetic resonance imaging study. *Circulation* 2010;121:870-878.
9. Ghanem A, Muller A, Nahle CP, Kocurek J, Werner N, Hammerstingl C, Schild HH, Schwab JO, Mellert F, Fimmers R, Nickenig G, Thomas D. Risk and fate of cerebral

1  
2  
3 embolism after transfemoral aortic valve implantation: a prospective pilot study with  
4 diffusion-weighted magnetic resonance imaging. *Journal of the American College of*  
5 *Cardiology* 2010;55:1427-1432.

6 **10.** Fairbairn TA, Mather AN, Bijsterveld P, Worthy G, Currie S, Goddard AJ, Blackman DJ,  
7 Plein S, Greenwood JP. Diffusion-weighted MRI determined cerebral embolic infarction  
8 following transcatheter aortic valve implantation: assessment of predictive risk factors and  
9 the relationship to subsequent health status. *Heart* 2012;98:18-23.

10 **11.** Uddin A, Fairbairn TA, Djoukhader IK, Igra M, Kidambi A, Motwani M, Herzog B, Ripley  
11 DP, Musa TA, Goddard AJ, Blackman DJ, Plein S, Greenwood JP. Consequence of cerebral  
12 embolism after transcatheter aortic valve implantation compared with contemporary surgical  
13 aortic valve replacement: effect on health-related quality of life. *Circulation Cardiovascular*  
14 *interventions* 2015;8:e001913.

15 **12.** Vermeer SE, Prins ND, den Heijer T, Hofman A, Koudstaal PJ, Breteler MM. Silent brain  
16 infarcts and the risk of dementia and cognitive decline. *The New England journal of medicine*  
17 2003;348:1215-1222.

18 **13.** Meller SM, Baumbach A, Brickman AM, Lansky AJ. Clinical implications for diffusion-  
19 weighted MRI brain lesions associated with transcatheter aortic valve replacement.  
20 *Catheterization and cardiovascular interventions : official journal of the Society for Cardiac*  
21 *Angiography & Interventions* 2014;83:502-508.

22 **14.** Meredith IT, Walters DL, Dumonteil N, Worthley SG, Tchetché D, Manoharan G,  
23 Blackman DJ, Rioufol G, Hildick-Smith D, Whitbourn RJ, Lefevre T, Lange R, Muller R,  
24 Redwood S, Feldman TE, Alocco DJ, Dawkins KD. 1-Year Outcomes With the Fully  
25 Repositionable and Retrievable Lotus Transcatheter Aortic Replacement Valve in 120 High-  
26 Risk Surgical Patients With Severe Aortic Stenosis: Results of the REPRISE II Study. *JACC*  
27 *Cardiovascular interventions* 2016;9:376-384.

28 **15.** Gooley RP, Talman AH, Cameron JD, Lockwood SM, Meredith IT. Comparison of Self-  
29 Expanding and Mechanically Expanded Transcatheter Aortic Valve Prostheses. *JACC*  
30 *Cardiovascular interventions* 2015;8:962-971.

31 **16.** Vahanian A, Alfieri O, Al-Attar N, Antunes M, Bax J, Cormier B, Cribier A, De Jaegere P,  
32 Fournial G, Kappetein AP, Kovac J, Ludgate S, Maisano F, Moat N, Mohr F, Nataf P, Pierard  
33 L, Pomar JL, Schofer J, Tornos P, Tuzcu M, van Hout B, Von Segesser LK, Walther T,  
34 European Association of Cardio-Thoracic S, European Society of C, European Association  
35 of Percutaneous Cardiovascular I. Transcatheter valve implantation for patients with aortic  
36 stenosis: a position statement from the European Association of Cardio-Thoracic Surgery  
37 (EACTS) and the European Society of Cardiology (ESC), in collaboration with the European  
38 Association of Percutaneous Cardiovascular Interventions (EAPCI). *European heart journal*  
39 2008;29:1463-1470.

40 **17.** Piazza N, Grube E, Gerckens U, den Heijer P, Linke A, Luha O, Ramondo A, Ussia G,  
41 Wenaweser P, Windecker S, Laborde JC, de Jaegere P, Serruys PW. Procedural and 30-  
42 day outcomes following transcatheter aortic valve implantation using the third generation (18  
43 Fr) corevalve revalving system: results from the multicentre, expanded evaluation registry 1-  
44 year following CE mark approval. *EuroIntervention : journal of EuroPCR in collaboration with*  
45 *the Working Group on Interventional Cardiology of the European Society of Cardiology*  
46 2008;4:242-249.

47 **18.** Meredith IT, Hood KL, Haratani N, Alocco DJ, Dawkins KD. Boston Scientific Lotus  
48 valve. *EuroIntervention : journal of EuroPCR in collaboration with the Working Group on*  
49 *Interventional Cardiology of the European Society of Cardiology* 2012;8 Suppl Q:Q70-74.

50 **19.** Kappetein AP, Head SJ, Genereux P, Piazza N, van Mieghem NM, Blackstone EH, Brott  
51 TG, Cohen DJ, Cutlip DE, van Es GA, Hahn RT, Kirtane AJ, Krucoff MW, Kodali S, Mack  
52 MJ, Mehran R, Rodes-Cabau J, Vranckx P, Webb JG, Windecker S, Serruys PW, Leon MB.  
53 Updated standardized endpoint definitions for transcatheter aortic valve implantation: the  
54 Valve Academic Research Consortium-2 consensus document. *European heart journal*  
55 2012;33:2403-2418.

56 **20.** Hachinski V, Iadecola C, Petersen RC, Breteler MM, Nyenhuis DL, Black SE, Powers  
57 WJ, DeCarli C, Merino JG, Kalara RN, Vinters HV, Holtzman DM, Rosenberg GA, Wallin A,

1  
2  
3 Dichgans M, Marler JR, Leblanc GG. National Institute of Neurological Disorders and Stroke-  
4 Canadian Stroke Network vascular cognitive impairment harmonization standards. *Stroke; a*  
5 *journal of cerebral circulation* 2006;37:2220-2241.

6 **21.** Knipp SC, Kahlert P, Jokisch D, Schlamann M, Wendt D, Weimar C, Jakob H, Thielmann  
7 M. Cognitive function after transapical aortic valve implantation: a single-centre study with 3-  
8 month follow-up. *Interactive cardiovascular and thoracic surgery* 2013;16:116-122.

9 **22.** Ghanem A, Kocurek J, Sinning JM, Wagner M, Becker BV, Vogel M, Schroder T,  
10 Wolfsgruber S, Vasa-Nicotera M, Hammerstingl C, Schwab JO, Thomas D, Werner N,  
11 Grube E, Nickenig G, Muller A. Cognitive trajectory after transcatheter aortic valve  
12 implantation. *Circulation Cardiovascular interventions* 2013;6:615-624.

13 **23.** Zamvar V, Williams D, Hall J, Payne N, Cann C, Young K, Karthikeyan S, Dunne J.  
14 Assessment of neurocognitive impairment after off-pump and on-pump techniques for  
15 coronary artery bypass graft surgery: prospective randomised controlled trial. *Bmj*  
16 2002;325:1268.

17 **24.** Crum RM, Anthony JC, Bassett SS, Folstein MF. Population-based norms for the Mini-  
18 Mental State Examination by age and educational level. *Jama* 1993;269:2386-2391.

19 **25.** Roach GW, Kanchuger M, Mangano CM, Newman M, Nussmeier N, Wolman R,  
20 Aggarwal A, Marschall K, Graham SH, Ley C. Adverse cerebral outcomes after coronary  
21 bypass surgery. Multicenter Study of Perioperative Ischemia Research Group and the  
22 Ischemia Research and Education Foundation Investigators. *The New England journal of*  
23 *medicine* 1996;335:1857-1863.

24 **26.** Kahlert P, Al-Rashid F, Dottger P, Mori K, Plicht B, Wendt D, Bergmann L, Kottenberg E,  
25 Schlamann M, Mummel P, Holle D, Thielmann M, Jakob HG, Konorza T, Heusch G, Erbel R,  
26 Eggebrecht H. Cerebral embolization during transcatheter aortic valve implantation: a  
27 transcranial Doppler study. *Circulation* 2012;126:1245-1255.

28 **27.** Van Mieghem NM, El Faquir N, Rahhab Z, Rodriguez-Olivares R, Wilschut J, Ouhlous  
29 M, Galema TW, Geleijnse ML, Kappetein AP, Schipper ME, de Jaegere PP. Incidence and  
30 predictors of debris embolizing to the brain during transcatheter aortic valve implantation.  
31 *JACC Cardiovascular interventions* 2015;8:718-724.

32 **28.** Ringer TM, Neumann-Haefelin T, Sobel RA, Moseley ME, Yenari MA. Reversal of early  
33 diffusion-weighted magnetic resonance imaging abnormalities does not necessarily reflect  
34 tissue salvage in experimental cerebral ischemia. *Stroke; a journal of cerebral circulation*  
35 2001;32:2362-2369.

36 **29.** Sacco RL, Kasner SE, Broderick JP, Caplan LR, Connors JJ, Culebras A, Elkind MS,  
37 George MG, Hamdan AD, Higashida RT, Hoh BL, Janis LS, Kase CS, Kleindorfer DO, Lee  
38 JM, Moseley ME, Peterson ED, Turan TN, Valderrama AL, Vinters HV, American Heart  
39 Association Stroke Council CoCS, Anesthesia, Council on Cardiovascular R, Intervention,  
40 Council on C, Stroke N, Council on E, Prevention, Council on Peripheral Vascular D, Council  
41 on Nutrition PA, Metabolism. An updated definition of stroke for the 21st century: a  
42 statement for healthcare professionals from the American Heart Association/American  
43 Stroke Association. *Stroke; a journal of cerebral circulation* 2013;44:2064-2089.

44 **30.** Rodes-Cabau J, Dumont E, Boone RH, Larose E, Bagur R, Gurvitch R, Bedard F, Doyle  
45 D, De Larochelliere R, Jayasuria C, Villeneuve J, Marrero A, Cote M, Pibarot P, Webb JG.  
46 Cerebral embolism following transcatheter aortic valve implantation: comparison of  
47 transfemoral and transapical approaches. *Journal of the American College of Cardiology*  
48 2011;57:18-28.

49 **31.** Leon MB, Smith CR, Mack MJ, Makkar RR, Svensson LG, Kodali SK, Thourani VH,  
50 Tuzcu EM, Miller DC, Herrmann HC, Doshi D, Cohen DJ, Pichard AD, Kapadia S, Dewey T,  
51 Babaliaros V, Szeto WY, Williams MR, Kereiakes D, Zajarias A, Greason KL, Whisenant BK,  
52 Hodson RW, Moses JW, Trento A, Brown DL, Fearon WF, Pibarot P, Hahn RT, Jaber WA,  
53 Anderson WN, Alu MC, Webb JG. Transcatheter or Surgical Aortic-Valve Replacement in  
54 Intermediate-Risk Patients. *The New England journal of medicine* 2016;374:1609-1620.

55 **32.** Haussig S, Mangner N, Dwyer MG, Lehmkuhl L, Lucke C, Woitek F, Holzhey DM, Mohr  
56 FW, Gutberlet M, Zivadinov R, Schuler G, Linke A. Effect of a Cerebral Protection Device on  
57  
58  
59

1  
2  
3 Brain Lesions Following Transcatheter Aortic Valve Implantation in Patients With Severe  
4 Aortic Stenosis: The CLEAN-TAVI Randomized Clinical Trial. *Jama* 2016;316:592-601.

5 **33.** Kapadia SR, Kodali S, Makkar R, Mehran R, Lazar RM, Zivadinov R, Dwyer MG,  
6 Jilaihawi H, Virmani R, Anwaruddin S, Thourani VH, Nazif T, Mangner N, Woitek F,  
7 Krishnaswamy A, Mick S, Chakravarty T, Nakamura M, McCabe JM, Satler L, Zajarias A,  
8 Szeto WY, Svensson L, Alu MC, White RM, Kraemer C, Parhizgar A, Leon MB, Linke A,  
9 Investigators ST. Protection Against Cerebral Embolism During Transcatheter Aortic Valve  
10 Replacement. *Journal of the American College of Cardiology* 2017;69:367-377.

11 **34.** Windham BG, Deere B, Griswold ME, Wang W, Bezerra DC, Shibata D, Butler K,  
12 Knopman D, Gottesman RF, Heiss G, Mosley TH, Jr. Small Brain Lesions and Incident  
13 Stroke and Mortality: A Cohort Study. *Annals of internal medicine* 2015;163:22-31.

14  
15  
16  
17  
18  
19  
20  
21  
22  
23  
24  
25  
26  
27  
28  
29  
30  
31  
32  
33  
34  
35  
36  
37  
38  
39  
40  
41  
42  
43  
44  
45  
46  
47  
48  
49  
50  
51  
52  
53  
54  
55  
56  
57  
58  
59  
60

For peer review only



## TABLES

**Table 1** – Patient characteristics in those with 6 month follow up.

|                                    | Lotus (n=29) | CoreValve (n=37) | p Value*     |
|------------------------------------|--------------|------------------|--------------|
| Age (years)                        | 79.8±8.9     | 81.2±7.2         | 0.459        |
| Male, n (%)                        | 14 (48)      | 17 (46)          | 0.851        |
| EuroSCORE II                       | 4.13±3.30    | 5.55±3.79        | 0.115        |
| STS score (%)                      | 4.04±2.59    | 5.28±3.41        | 0.109        |
| BMI (kg/m <sup>2</sup> )           | 28.5±5.2     | 27.2±5.4         | 0.323        |
| Hypertension, n (%)                | 11 (38)      | 20 (54)          | 0.157        |
| Diabetes, n (%)                    | 5 (17)       | 4 (11)           | 0.450        |
| Hyperlipidaemia, n (%)             | 17 (59)      | 18 (49)          | 0.488        |
| Atrial Fibrillation, n (%)         | 5 (17)       | 9 (24)           | 0.449        |
| Previous MI, n (%)                 | 7 (24)       | 2 (5)            | <b>0.026</b> |
| Previous PCI, n (%)                | 9 (31)       | 10 (27)          | 0.774        |
| Previous CABG, n (%)               | 5 (17)       | 8 (22)           | 0.618        |
| Previous Stroke, n (%)             | 7 (24)       | 6 (16)           | 0.454        |
| Peripheral Vascular Disease, n (%) | 4 (14)       | 5 (14)           | 0.991        |
| eGFR (ml/min/1.73m <sup>2</sup> )  | 69±19        | 64±17            | 0.342        |

Values are mean±SD or n (%). \*p Value for comparison between procedure types.

STS, Society of Thoracic Surgeons score; BMI, body mass index; eGFR, estimated glomerular filtration rate; PCI, percutaneous coronary intervention; CABG, coronary artery bypass grafting; MI, myocardial infarction.

**Table 2** – Catheterization data for TAVI implant procedures

|                             | <b>Lotus (n=29)</b>                                 | <b>CoreValve (n=37)</b>                                               | <b>p Value*</b> |
|-----------------------------|-----------------------------------------------------|-----------------------------------------------------------------------|-----------------|
| TAVI size (n(%))            | 23mm (7 (24%))<br>25mm (8 (28%))<br>27mm (14 (48%)) | 23mm (4 (11%))<br>26mm (8 (22%))<br>29mm (18 (49%))<br>31mm (7 (19%)) | -               |
| Femoral route, n (%)        | 29 (100)                                            | 27 (73)                                                               | 0.081           |
| Sheath size (French)        | 18 (28%)<br>20 (52%)<br>22 (20%)                    | 18 (100%)                                                             |                 |
| Pullback PG (mmHg)          | 56±27                                               | 43±19                                                                 | <b>0.023</b>    |
| Fluoroscopy time (min)      | 29±8                                                | 18±11                                                                 | <b>0.001</b>    |
| Procedure time (min)        | 159±42                                              | 143±50                                                                | 0.194           |
| Contrast (ml)               | 120±43                                              | 134±43                                                                | 0.212           |
| Pre-dilatation BAV, n (%)   | 25 (86)                                             | 28 (77)                                                               | 0.286           |
| Post-dilatation, n (%)      | 0 (0)                                               | 5 (14)                                                                | <b>0.039</b>    |
| TAVI repositioned, n (%)    | 7 (24)                                              | 0 (0)                                                                 | <b>0.002</b>    |
| TAVI embolization, n (%)    | 0 (0)                                               | 3 (8)                                                                 | 0.117           |
| Need for second TAVI, n (%) | 0 (0)                                               | 3 (8)                                                                 | 0.117           |

\*Independent samples t-test

**Table 3** – Comparison of MRI DWI imaging following Boston Lotus and Medtronic CoreValve

|                                                | Lotus (n=29)    | CoreValve (n=37) | p Value      |
|------------------------------------------------|-----------------|------------------|--------------|
| Incidence of new micro-infarction (n(%))       | 23(79)          | 22(59)           | <b>0.025</b> |
| Number of new micro-infarcts per patient       | 3.5 (IQR 7.0)   | 2.0 (IQR 3.0)    | <b>0.002</b> |
| Mean micro-infarct volume per patient (ml)     | 0.36 (IQR 0.57) | 0.17 (IQR 0.21)  | 0.166        |
| Number of new small lesions (<5mm) (n(%))      | 124(78)         | 41(72)           | <b>0.005</b> |
| Number of new large lesions (≥5mm) (n(%))      | 34(22)          | 16(28)           | <b>0.036</b> |
| Number of patients with new ACA lesions (n(%)) | 14(48)          | 2(5)             | <b>0.001</b> |
| Number of patients with new MCA lesions (n(%)) | 20(69)          | 19(51)           | 0.149        |
| Number of patients with new PCA lesions (n(%)) | 10(34)          | 6(16)            | 0.086        |
| Number of patients with new VBA lesions (n(%)) | 15(52)          | 7(19)            | <b>0.005</b> |

ACA: anterior cerebral artery, MCA: middle cerebral artery, PCA: posterior cerebral artery,

VBA: vertebrobasilar artery.

**Table 4** – Summary of neurocognitive test scores at baseline, 30d and 12m.

|                           | TAVI           | Baseline    | 30 days     | p Value*     | 12 months   | p Value**    |
|---------------------------|----------------|-------------|-------------|--------------|-------------|--------------|
| <b>MMSE</b>               | Lotus          | 28.6±1.6    | 28.8±1.8    | 0.468        | 28.7±2.0    | 0.743        |
|                           | CoreValve      | 28.8±1.8    | 28.4±2.0    | 0.251        | 27.9±2.8    | 0.277        |
| <b>HVLT</b>               |                |             |             |              |             |              |
|                           | Total learning |             |             |              |             |              |
|                           | Lotus          | 21.4±7.2    | 21.5±4.1    | 0.913        | 23.3±6.1    | 0.104        |
|                           | CoreValve      | 17.7±6.3    | 18.6±6.1    | 0.512        | 18.3±7.8    | 0.764        |
| Delayed Recall            | Lotus          | 7.6±3.0     | 6.3±3.4     | <b>0.038</b> | 9.0±6.7     | <b>0.028</b> |
|                           | CoreValve      | 5.8±2.8     | 5.3±3.8     | 0.296        | 4.3±4.4     | 0.419        |
| Discrimination Index      | Lotus          | 10.2±1.5    | 8.6±2.9     | <b>0.015</b> | 10.1±2.4    | <b>0.010</b> |
|                           | CoreValve      | 9.6±2.1     | 9.1±3.4     | 0.373        | 7.9±4.5     | 0.147        |
| <b>Trail Making Tests</b> |                |             |             |              |             |              |
| A                         | Lotus          | 47.0±15.0   | 56.0±27.6   | 0.112        | 50.5±19.7   | 0.354        |
|                           | CoreValve      | 56.9±27.8   | 61.1±40.0   | 0.566        | 66.1±49.8   | 0.431        |
| B                         | Lotus          | 170.9±86.5  | 140.7±62.8  | <b>0.006</b> | 152.3±87.5  | 0.273        |
|                           | CoreValve      | 171.1±121.4 | 155.2±79.0  | 0.548        | 143.3±64.4  | 0.969        |
| <b>DSST</b>               | Lotus          | 43.2±15.8   | 45.5±16.0   | 0.254        | 44.2±13.5   | 0.253        |
|                           | CoreValve      | 33.9±14.1   | 34.6±13.3   | 0.704        | 34.4±15.7   | 0.633        |
| <b>LNS</b>                | Lotus          | 7.6±4.5     | 8.6±3.5     | 0.387        | 8.6±2.6     | 0.876        |
|                           | CoreValve      | 8.3±5.1     | 8.8±4.2     | 0.662        | 7.9±4.8     | 0.291        |
| <b>Grooved Pegboard</b>   |                |             |             |              |             |              |
| Dominant score            | Lotus          | 163.1±102.4 | 136.9±75.7  | 0.336        | 142.7±38.0  | 0.670        |
|                           | CoreValve      | 157.3±57.2  | 132.1±81.3  | 0.162        | 169.0±60.4  | 0.110        |
| Non-dominant score        | Lotus          | 158.0±37.7  | 148.5±53.4  | 0.373        | 159.6±47.0  | 0.658        |
|                           | CoreValve      | 180.9±58.2  | 173.9±104.2 | 0.654        | 215.9±124.4 | <b>0.004</b> |

Mean±SD.

\* comparing values at baseline and 30d, same TAVI design, paired samples t-test

\*\* comparing values at 30d and 12 months, same TAVI design, paired samples t-test

**Table 5** – Within group comparison of mean change in cognitive domain over 12 months in patients with and without DW-MRI lesions.

|                            | Boston Lotus (n=25) |                |              | Medtronic CoreValve (n=24) |               |              |
|----------------------------|---------------------|----------------|--------------|----------------------------|---------------|--------------|
|                            | DWI -ve (n=6)       | DWI +ve (n=19) | p Value      | DWI -ve (n=11)             | DWI+ve (n=13) | p Value      |
| <b>MMSE</b>                | 1.2±0.8             | -0.4±1.9       | <b>0.025</b> | -0.9±2.5                   | -0.7±2.6      | 0.840        |
| <b>HVLT Learning</b>       | 4.2±5.2             | 1.2±7.3        | 0.454        | 1.1±3.9                    | 1.0±9.1       | 0.691        |
| <b>HVLT Delayed</b>        | 6.3±12.9            | -0.1±3.3       | 0.177        | -0.2±2.5                   | -1.1±3.1      | 0.456        |
| <b>HVLT Discrimination</b> | 0.0±1.5             | -0.1±2.6       | 0.733        | 0.8±2.3                    | -2.3±3.5      | <b>0.019</b> |
| <b>TMT A</b>               | 15.5±20.8           | -0.1±15.3      | 0.059        | 18.9±64.9                  | 5.0±14.7      | 0.562        |
| <b>TMT B</b>               | -13.0±88.9          | -18.3±61.4     | 0.870        | 19.6±61.6                  | -1.4±64.4     | 0.454        |
| <b>DSST</b>                | 4.0±10.0            | -0.4±9.8       | 0.346        | -0.1±6.7                   | 5.0±13.7      | 0.370        |
| <b>LNS</b>                 | 2.4±3.0             | 0.7±5.1        | 0.534        | -0.5±5.0                   | 0.8±3.6       | 0.474        |
| <b>GPBT Dominant</b>       | -8.2±31.5           | -24.5±108.0    | 0.721        | 0.5±37.6                   | 22.6±37.7     | 0.186        |
| <b>GPBT Non-Dominant</b>   | -26.0±83.7          | -3.2±51.3      | 0.914        | 43.0±81.3                  | 20.8±66.8     | 0.235        |

Mean±SD.

1  
2  
3 **Figure 1:** Study Profile

4  
5 **Figure 2:** Diffusion weighted MRI of the brain examining silent injury with TAVI.

6  
7 Cerebral images, including the brainstem and cerebellum before (A) and after (B) TAVI  
8  
9 procedure. Multiple new cerebral infarctions were seen, some of which are highlighted by  
10  
11 the red arrows.  
12

13 **Figure 3:** Line graph depicting change in MMSE (A and B) and HVLT Discrimination Index  
14  
15 (C and D) over time following Lotus and CoreValve.

16  
17 (Red lines indicate patients with DW-MRI micro-infarcts, blue lines those without).  
18  
19  
20  
21  
22  
23  
24  
25  
26  
27  
28  
29  
30  
31  
32  
33  
34  
35  
36  
37  
38  
39  
40  
41  
42  
43  
44  
45  
46  
47  
48  
49  
50  
51  
52  
53  
54  
55  
56  
57  
58  
59  
60

1  
2  
3  
4  
5  
6  
7  
8  
9  
10  
11  
12  
13  
14  
15  
16  
17  
18  
19  
20  
21  
22  
23  
24  
25  
26  
27  
28  
29  
30  
31  
32  
33  
34  
35  
36  
37  
38  
39  
40  
41  
42  
43  
44  
45  
46  
47  
48  
49  
50  
51  
52  
53  
54  
55  
56  
57  
58  
59  
60

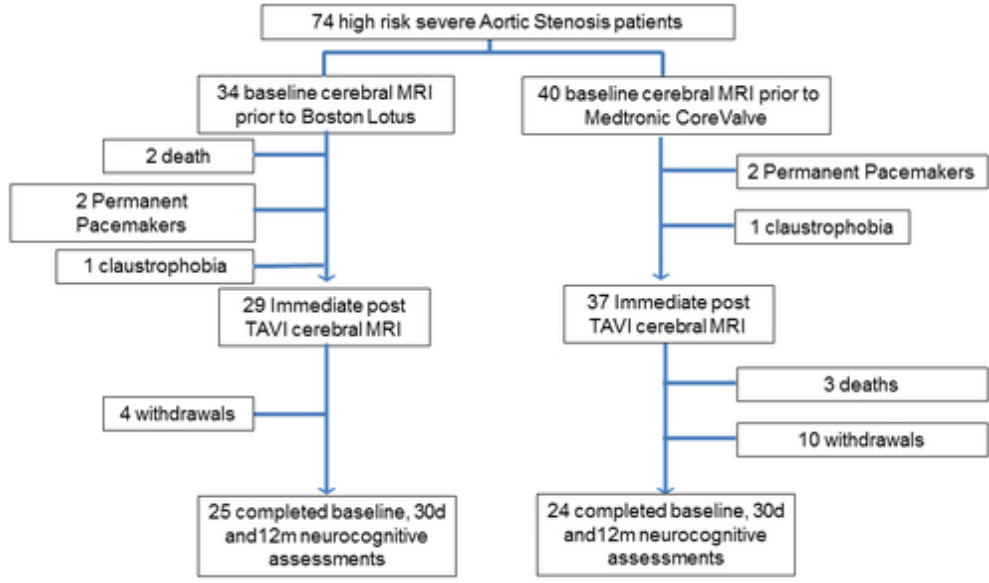

Figure 1: Study Profile

42x25mm (300 x 300 DPI)

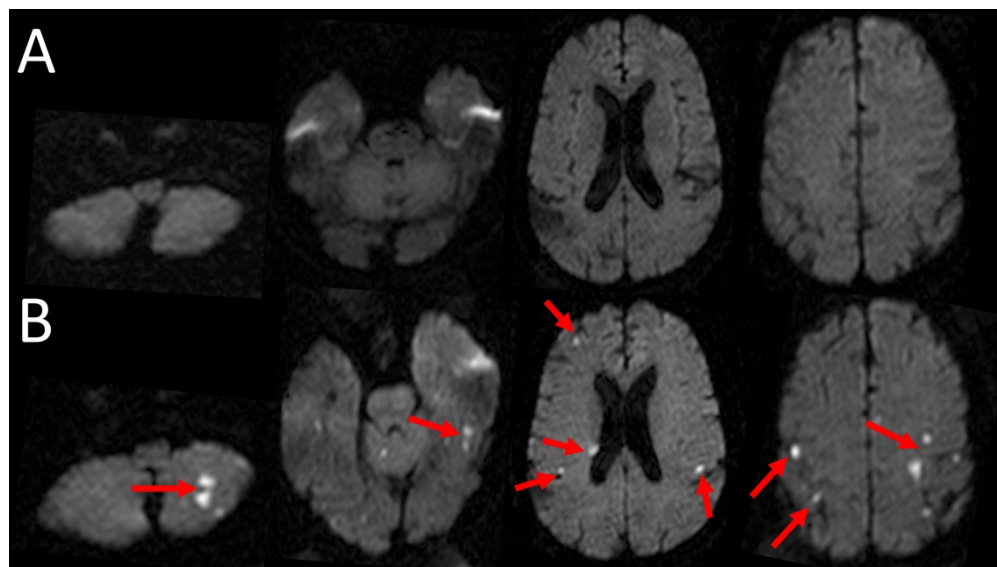

Figure 2: Diffusion weighted MRI of the brain examining silent injury with TAVI. Cerebral images, including the brainstem and cerebellum before (A) and after (B) TAVI procedure. Multiple new cerebral infarctions were seen, some of which are highlighted by the red arrows.

338x190mm (300 x 300 DPI)



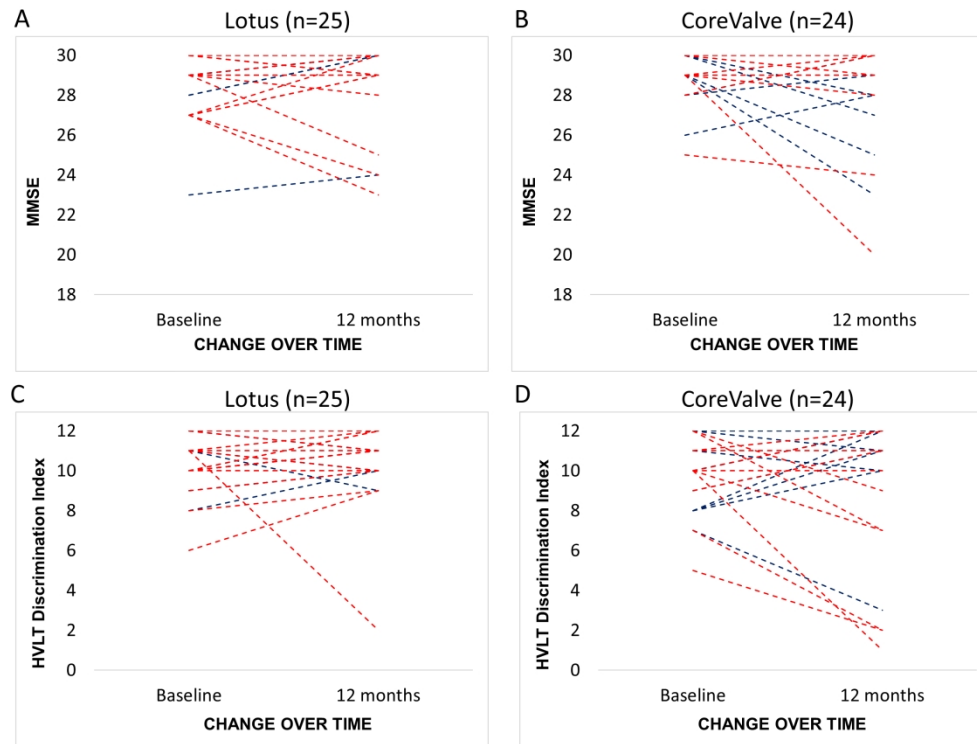

Figure 3: Line graph depicting change in MMSE (A and B) and HVL Discrimination Index (C and D) over time following Lotus and CoreValve. (Red lines indicate patients with DW-MRI micro-infarcts, blue lines those without).

254x190mm (300 x 300 DPI)

High risk symptomatic severe Aortic Stenosis<sup>§</sup> patients

Baseline 1.5T Cerebral MRI\*  
&  
Baseline neurocognitive assessment\*\*

TAVI procedure  
(Medtronic CoreValve or Boston Lotus)

Immediate 1.5T Cerebral MRI  
(when medically fit)

Neurocognitive assessments at  
30 days and 12 months

**Inclusion** criteria:  
Age > 18 years  
<sup>§</sup> AVA ≤1.0cm<sup>2</sup> or Vmax >4m/s  
  
**Exclusion** criteria:  
Any contraindication to MRI  
MMSE <10

1  
2  
3  
4  
5  
6  
7  
8  
9  
10  
11  
12  
13  
14  
15  
16  
17  
18  
19  
20  
21  
22  
23  
24  
25  
26  
27  
28  
29  
30  
31  
32  
33  
34  
35  
36  
37  
38  
39  
40  
41

\* Comprising T2 weighted Turbo Spin Echo sequence, T2 weighted Fast Field Echo, Diffusion weighted spin echo sequence

\*\* Comprising NART, mini mental state examination, Hopkins Verbal Learning Tests, Letter Number Sequencing task, Trail Making Tests A and B, Digit-Symbol Substitution Test and the Grooved Pegboard Test

## STROBE Statement—checklist of items that should be included in reports of observational studies

|                              | Item No | Recommendation                                                                                                                                                                                                                                                                                                                                                                                                                                                                                                                                                                                                                                                                                   |
|------------------------------|---------|--------------------------------------------------------------------------------------------------------------------------------------------------------------------------------------------------------------------------------------------------------------------------------------------------------------------------------------------------------------------------------------------------------------------------------------------------------------------------------------------------------------------------------------------------------------------------------------------------------------------------------------------------------------------------------------------------|
| <b>Title and abstract</b>    | 1       | (a) Indicate the study's design with a commonly used term in the title or the abstract (pages 1 and 3)<br>(b) Provide in the abstract an informative and balanced summary of what was done and what was found (page 3)                                                                                                                                                                                                                                                                                                                                                                                                                                                                           |
| <b>Introduction</b>          |         |                                                                                                                                                                                                                                                                                                                                                                                                                                                                                                                                                                                                                                                                                                  |
| Background/rationale         | 2       | Explain the scientific background and rationale for the investigation being reported (page 6-7)                                                                                                                                                                                                                                                                                                                                                                                                                                                                                                                                                                                                  |
| Objectives                   | 3       | State specific objectives, including any prespecified hypotheses (pages 3, 7)                                                                                                                                                                                                                                                                                                                                                                                                                                                                                                                                                                                                                    |
| <b>Methods</b>               |         |                                                                                                                                                                                                                                                                                                                                                                                                                                                                                                                                                                                                                                                                                                  |
| Study design                 | 4       | Present key elements of study design early in the paper (pages 3, 7)                                                                                                                                                                                                                                                                                                                                                                                                                                                                                                                                                                                                                             |
| Setting                      | 5       | Describe the setting, locations, and relevant dates, including periods of recruitment, exposure, follow-up, and data collection (page 3, 7)                                                                                                                                                                                                                                                                                                                                                                                                                                                                                                                                                      |
| Participants                 | 6       | (a) <i>Cohort study</i> —Give the eligibility criteria, and the sources and methods of selection of participants. Describe methods of follow-up<br><i>Case-control study</i> —Give the eligibility criteria, and the sources and methods of case ascertainment and control selection. Give the rationale for the choice of cases and controls<br><i>Cross-sectional study</i> —Give the eligibility criteria, and the sources and methods of selection of participants<br>(b) <i>Cohort study</i> —For matched studies, give matching criteria and number of exposed and unexposed<br><i>Case-control study</i> —For matched studies, give matching criteria and the number of controls per case |
| Variables                    | 7       | Clearly define all outcomes, exposures, predictors, potential confounders, and effect modifiers. Give diagnostic criteria, if applicable (pages 8, 9)                                                                                                                                                                                                                                                                                                                                                                                                                                                                                                                                            |
| Data sources/<br>measurement | 8*      | For each variable of interest, give sources of data and details of methods of assessment (measurement). Describe comparability of assessment methods if there is more than one group (pages 8, 9)                                                                                                                                                                                                                                                                                                                                                                                                                                                                                                |
| Bias                         | 9       | Describe any efforts to address potential sources of bias (pages 9, 16)                                                                                                                                                                                                                                                                                                                                                                                                                                                                                                                                                                                                                          |
| Study size                   | 10      | Explain how the study size was arrived at (page 10)                                                                                                                                                                                                                                                                                                                                                                                                                                                                                                                                                                                                                                              |
| Quantitative variables       | 11      | Explain how quantitative variables were handled in the analyses. If applicable, describe which groupings were chosen and why (page 9)                                                                                                                                                                                                                                                                                                                                                                                                                                                                                                                                                            |
| Statistical methods          | 12      | (a) Describe all statistical methods, including those used to control for confounding (page 9)<br>(b) Describe any methods used to examine subgroups and interactions (page 9)<br>(c) Explain how missing data were addressed<br>(d) <i>Cohort study</i> —If applicable, explain how loss to follow-up was addressed<br><i>Case-control study</i> —If applicable, explain how matching of cases and controls was addressed<br><i>Cross-sectional study</i> —If applicable, describe analytical methods taking account of sampling strategy<br>(e) Describe any sensitivity analyses                                                                                                              |

Continued on next page

**Results**

|                  |     |                                                                                                                                                                                                                                                                                                                                                                                                               |
|------------------|-----|---------------------------------------------------------------------------------------------------------------------------------------------------------------------------------------------------------------------------------------------------------------------------------------------------------------------------------------------------------------------------------------------------------------|
| Participants     | 13* | (a) Report numbers of individuals at each stage of study—eg numbers potentially eligible, examined for eligibility, confirmed eligible, included in the study, completing follow-up, and analysed (Page 10, Figure 1)<br>(b) Give reasons for non-participation at each stage (Figure 1)<br>(c) Consider use of a flow diagram (Figure 1)                                                                     |
| Descriptive data | 14* | (a) Give characteristics of study participants (eg demographic, clinical, social) and information on exposures and potential confounders (Table 1 on page 23)<br>(b) Indicate number of participants with missing data for each variable of interest<br>(c) <i>Cohort study</i> —Summarise follow-up time (eg, average and total amount)                                                                      |
| Outcome data     | 15* | <i>Cohort study</i> —Report numbers of outcome events or summary measures over time<br><i>Case-control study</i> —Report numbers in each exposure category, or summary measures of exposure<br><i>Cross-sectional study</i> —Report numbers of outcome events or summary measures                                                                                                                             |
| Main results     | 16  | (a) Give unadjusted estimates and, if applicable, confounder-adjusted estimates and their precision (eg, 95% confidence interval). Make clear which confounders were adjusted for and why they were included<br>(b) Report category boundaries when continuous variables were categorized<br>(c) If relevant, consider translating estimates of relative risk into absolute risk for a meaningful time period |
| Other analyses   | 17  | Report other analyses done—eg analyses of subgroups and interactions, and sensitivity analyses                                                                                                                                                                                                                                                                                                                |

**Discussion**

|                  |    |                                                                                                                                                                                          |
|------------------|----|------------------------------------------------------------------------------------------------------------------------------------------------------------------------------------------|
| Key results      | 18 | Summarise key results with reference to study objectives (page 13)                                                                                                                       |
| Limitations      | 19 | Discuss limitations of the study, taking into account sources of potential bias or imprecision. Discuss both direction and magnitude of any potential bias (page 17)                     |
| Interpretation   | 20 | Give a cautious overall interpretation of results considering objectives, limitations, multiplicity of analyses, results from similar studies, and other relevant evidence (pages 14-16) |
| Generalisability | 21 | Discuss the generalisability (external validity) of the study results                                                                                                                    |

**Other information**

|         |    |                                                                                                                                                                         |
|---------|----|-------------------------------------------------------------------------------------------------------------------------------------------------------------------------|
| Funding | 22 | Give the source of funding and the role of the funders for the present study and, if applicable, for the original study on which the present article is based (page 18) |
|---------|----|-------------------------------------------------------------------------------------------------------------------------------------------------------------------------|

\*Give information separately for cases and controls in case-control studies and, if applicable, for exposed and unexposed groups in cohort and cross-sectional studies.

**Note:** An Explanation and Elaboration article discusses each checklist item and gives methodological background and published examples of transparent reporting. The STROBE checklist is best used in conjunction with this article (freely available on the Web sites of PLoS Medicine at <http://www.plosmedicine.org/>, Annals of Internal Medicine at <http://www.annals.org/>, and Epidemiology at <http://www.epidem.com/>). Information on the STROBE Initiative is available at [www.strobe-statement.org](http://www.strobe-statement.org).

# BMJ Open

**Silent Cerebral Infarction and Cognitive Function following  
TAVI:  
An observational two-centre UK comparison of the 1st  
generation CoreValve and 2nd generation Lotus valve**

|                                 |                                                                                                                                                                                                                                                                                                                                                                                                                                                                                                                                                                                                                                                                                                                                                                                                                                                                                                                                                                                                                                |
|---------------------------------|--------------------------------------------------------------------------------------------------------------------------------------------------------------------------------------------------------------------------------------------------------------------------------------------------------------------------------------------------------------------------------------------------------------------------------------------------------------------------------------------------------------------------------------------------------------------------------------------------------------------------------------------------------------------------------------------------------------------------------------------------------------------------------------------------------------------------------------------------------------------------------------------------------------------------------------------------------------------------------------------------------------------------------|
| Journal:                        | <i>BMJ Open</i>                                                                                                                                                                                                                                                                                                                                                                                                                                                                                                                                                                                                                                                                                                                                                                                                                                                                                                                                                                                                                |
| Manuscript ID                   | bmjopen-2018-022329.R1                                                                                                                                                                                                                                                                                                                                                                                                                                                                                                                                                                                                                                                                                                                                                                                                                                                                                                                                                                                                         |
| Article Type:                   | Research                                                                                                                                                                                                                                                                                                                                                                                                                                                                                                                                                                                                                                                                                                                                                                                                                                                                                                                                                                                                                       |
| Date Submitted by the Author:   | 05-Aug-2018                                                                                                                                                                                                                                                                                                                                                                                                                                                                                                                                                                                                                                                                                                                                                                                                                                                                                                                                                                                                                    |
| Complete List of Authors:       | Musa, Tarique; University of Leeds, LICAMM<br>Uddin, Akhlaque; University of Leeds, Multidisciplinary Cardiovascular Research Centre & The Division of Cardiovascular and Diabetes Research<br>Loveday, Catherine; University of Westminster, Cognitive Science Research Unit<br>Dobson, Laura; University of Leeds, LICAMM<br>Igra, Mark; Leeds Teaching Hospitals NHS Trust<br>Richards, Fiona; University of Leeds<br>Swoboda, Peter; University of Leeds, LICAMM<br>Singh, Anvesha; University of Leicester<br>Garg, Pankaj; University of Leeds, LICAMM<br>Foley, James; University of Leeds, LICAMM<br>Fent, Graham; University of Leeds, LICAMM<br>Goddard, Anthony; Leeds Teaching Hospitals NHS Trust<br>Malkin, Christopher; Leeds Teaching Hospitals NHS Trust<br>Plein, Sven<br>Blackman, Daniel; Leeds Teaching Hospitals NHS Trust<br>McCann, G; University of Leicester,<br>Greenwood, John; Leeds General Infirmary, Cardiology; University of Leeds, Leeds Institute of Cardiovascular and Metabolic Medicine |
| <b>Primary Subject Heading</b>: | Cardiovascular medicine                                                                                                                                                                                                                                                                                                                                                                                                                                                                                                                                                                                                                                                                                                                                                                                                                                                                                                                                                                                                        |
| Secondary Subject Heading:      | Cardiovascular medicine                                                                                                                                                                                                                                                                                                                                                                                                                                                                                                                                                                                                                                                                                                                                                                                                                                                                                                                                                                                                        |
| Keywords:                       | Transcatheter Aortic Valve Implantation, Cerebral MRI, Neurocognitive Function, Boston Lotus, Medtronic CoreValve                                                                                                                                                                                                                                                                                                                                                                                                                                                                                                                                                                                                                                                                                                                                                                                                                                                                                                              |
|                                 |                                                                                                                                                                                                                                                                                                                                                                                                                                                                                                                                                                                                                                                                                                                                                                                                                                                                                                                                                                                                                                |

SCHOLARONE™  
Manuscripts

**Silent Cerebral Infarction and Cognitive Function following TAVI:****An observational two-centre UK comparison of the 1<sup>st</sup> generation CoreValve and 2<sup>nd</sup> generation Lotus valve**

|                                                    |                                                                              |
|----------------------------------------------------|------------------------------------------------------------------------------|
| Dr Tarique Al Musa, BSc MBBS <sup>1</sup>          | <a href="mailto:t.a.musa@leeds.ac.uk">t.a.musa@leeds.ac.uk</a>               |
| Dr Akhlaque Uddin, BSc MBChB <sup>1</sup>          | <a href="mailto:a.uddin@leeds.ac.uk">a.uddin@leeds.ac.uk</a>                 |
| Dr Catherine Loveday PhD <sup>2</sup>              | <a href="mailto:C.Loveday@westminster.ac.uk">C.Loveday@westminster.ac.uk</a> |
| Dr Laura E. Dobson, MBChB MD <sup>1</sup>          | <a href="mailto:l.dobson@leeds.ac.uk">l.dobson@leeds.ac.uk</a>               |
| Dr Mark Igra, MD <sup>3</sup>                      | <a href="mailto:drmarkigra@gmail.com">drmarkigra@gmail.com</a>               |
| Mrs Fiona Richards, RN <sup>1</sup>                | <a href="mailto:f.richards@leeds.ac.uk">f.richards@leeds.ac.uk</a>           |
| Dr Peter P. Swoboda, MBBS PhD <sup>1</sup>         | <a href="mailto:p.swoboda@leeds.ac.uk">p.swoboda@leeds.ac.uk</a>             |
| Dr Anvesha Singh, MBChB <sup>4</sup>               | <a href="mailto:as707@leicester.ac.uk">as707@leicester.ac.uk</a>             |
| Dr Pankaj Garg, MBBS <sup>1</sup>                  | <a href="mailto:p.garg@leeds.ac.uk">p.garg@leeds.ac.uk</a>                   |
| Dr James R.J. Foley, BSc MBChB <sup>1</sup>        | <a href="mailto:j.foley@leeds.ac.uk">j.foley@leeds.ac.uk</a>                 |
| Dr Graham J. Fent, BSc MBChB <sup>1</sup>          | <a href="mailto:g.j.fent@leeds.ac.uk">g.j.fent@leeds.ac.uk</a>               |
| Dr Anthony J.P. Goddard, FRCR <sup>3</sup>         | <a href="mailto:tony.goddard1@nhs.net">tony.goddard1@nhs.net</a>             |
| Dr Christopher Malkin, MD <sup>3</sup>             | <a href="mailto:christopher.malkin@nhs.net">christopher.malkin@nhs.net</a>   |
| Prof. Sven Plein, MD, PhD <sup>1,3</sup>           | <a href="mailto:s.plein@leeds.ac.uk">s.plein@leeds.ac.uk</a>                 |
| Dr Daniel J. Blackman, MD <sup>3</sup>             | <a href="mailto:daniel.blackman1@nhs.net">daniel.blackman1@nhs.net</a>       |
| Prof. Gerald P McCann, BSc MBChB, MD <sup>4</sup>  | <a href="mailto:gpm12@le.ac.uk">gpm12@le.ac.uk</a>                           |
| Prof. John P. Greenwood, MBChB, PhD <sup>1,3</sup> | <a href="mailto:j.greenwood@leeds.ac.uk">j.greenwood@leeds.ac.uk</a>         |

<sup>1</sup>Multidisciplinary Cardiovascular Research Centre & The Division of Biomedical Imaging, Leeds Institute for Cardiovascular and Metabolic Medicine, University of Leeds, Leeds, UK.

<sup>2</sup>Cognitive Science Research Unit, University of Westminster, London, UK

<sup>3</sup>Leeds Teaching Hospitals NHS Trust, Leeds General Infirmary, Leeds, UK.

1  
2  
3 <sup>4</sup>Department of Cardiovascular Sciences, University of Leicester, BHF Cardiovascular Research  
4 Centre, and the National Institute of Health Research (NIHR) Cardiovascular Biomedical Research  
5 Unit, Glenfield Hospital, Leicester, UK.  
6  
7

8 **Short title:** Silent cerebral injury: CoreValve Vs. Lotus  
9

10  
11  
12 **Correspondence:**

13  
14 Professor J.P. Greenwood

15  
16 Multidisciplinary Cardiovascular Research Centre,

17  
18 Leeds Institute for Cardiovascular and Metabolic Medicine,

19  
20 University of Leeds, LS2 9JT, UK

21  
22 Tel +44 113 39 22650 Fax +44 113 3922311 Email: [j.greenwood@leeds.ac.uk](mailto:j.greenwood@leeds.ac.uk)  
23  
24  
25

26 **Word count:**

27  
28 **4,984 (including references)**

29  
30 **3,053 (excluding references)**  
31  
32  
33  
34  
35  
36  
37  
38  
39  
40  
41  
42  
43  
44  
45  
46  
47  
48  
49  
50  
51  
52  
53  
54  
55  
56  
57  
58  
59  
60

**ABSTRACT**

**Objective:** To compare the incidence of silent cerebral infarction and impact upon cognitive function following Transcatheter Aortic Valve Implantation (TAVI) with the first-generation CoreValve (Medtronic, Minneapolis, Minnesota) and second-generation Lotus valve (Boston Scientific, Natick Massachusetts).

**Design:** A prospective observational study comprising a 1.5 T cerebral MRI scan, performed preoperatively and immediately following TAVI, and neurocognitive assessments performed at baseline, 30 days and 1-year follow-up.

**Setting:** University hospitals of Leeds and Leicester, UK.

**Patients:** 66 (80.6±8.0 years, 47% male) high-risk severe symptomatic aortic stenosis patients recruited between April 2012 to May 2015.

**Main outcome measures:** Incidence of new cerebral microinfarction and objective decline in neurocognitive performance.

**Results:** All underwent cerebral MRI at baseline and immediately following TAVI, and 49 (25 Lotus, 24 CoreValve) completed neurocognitive assessments at baseline, 30 days and 1 year. There was a significantly greater incidence in new cerebral micro-infarction observed following the Lotus TAVI (23(79%) vs 22(59%),  $p=0.025$ ) with a greater number of new infarcts per patient (median 3.5 (IQR 7.0) vs. 2.0 (IQR 3.0),  $p=0.002$ ). The mean volume of infarcted cerebral tissue per patient was equivalent following the two prostheses ( $p=0.166$ ). More patients suffered new anterior (14(48%) vs. 2(5%),  $p=0.001$ ) and vertebrobasilar (15(52%) vs. 7(19%),  $p=0.005$ ) lesions following Lotus. Lotus was associated with a decline in verbal memory and psychomotor speed at 30 days. However, performance longitudinally at one year was preserved in all neurocognitive domains.

**Conclusions:** There was a higher incidence of silent cerebral micro-infarction and a greater number of lesions per patient following Lotus compared to CoreValve. However, there was no objective decline in neurocognitive function discernible at 1-year following TAVI with either prosthesis.



### Strengths and Limitations of this Study

- Contemporary study comprising both a novel TAVI design technology and an established device.
- A two-centre study combining both DW-MRI and cognitive assessments to comprehensively assess cerebral injury following TAVI.
- Mid-term follow-up to 1 year
- Not randomised.
- Higher field strength MRI available for more sensitive detection of cerebral embolic infarction.

**KEYWORDS:** Transcatheter Aortic Valve Implantation, Medtronic CoreValve, Boston Lotus Valve, Cerebral MRI, Neurocognitive function

**Abbreviations list**

|         |                                               |
|---------|-----------------------------------------------|
| BAV:    | balloon aortic valvuloplasty                  |
| CABG:   | coronary artery bypass grafting               |
| DSST:   | digit symbol substitution test                |
| DW-MRI: | diffusion weighted magnetic resonance imaging |
| eGFR    | estimated glomerular filtration rate          |
| GPBT:   | grooved pegboard test                         |
| HVLT:   | Hopkins verbal learning test                  |
| IQ:     | intelligent quotient                          |
| LNS:    | letter number sequencing                      |
| MDCT:   | multi detector computed tomography            |
| MI:     | myocardial infarction                         |
| MMSE:   | mini mental state examination                 |
| PCI:    | percutaneous coronary intervention            |
| SD:     | standard deviation                            |
| STS:    | Society of Thoracic Surgeons                  |
| TAVI:   | transcatheter aortic valve implantation       |
| TMT:    | trail making test                             |
| VARC:   | valve academic research consortium            |

## INTRODUCTION

Transcatheter aortic valve implantation (TAVI) is advocated by both European<sup>1</sup> and US<sup>2</sup> guidance in patients with symptomatic aortic stenosis deemed inoperable or with too high a predicted postoperative mortality. TAVI is cost-effective<sup>3</sup>, significantly improves quality of life<sup>4</sup>, and recent trial data suggest non-inferior to surgery in intermediate-risk patients<sup>5</sup>, potentially expanding its application to a broader population.

However, since the landmark PARTNER trial in 2010<sup>6</sup>, the inherent risk of disabling stroke associated with TAVI has been well recognised. Despite 10 years of refinement in transcatheter technology and delivery technique, stroke rates remain similar<sup>7</sup>. Importantly, TAVI is also associated with a high incidence (up to 84%) of silent cerebral embolism as detected by diffusion-weighted MRI (DW-MRI)<sup>8-10</sup>; more frequent than that following aortic valve surgery<sup>11</sup>.

The association of new DW-MRI lesions post-TAVI with cognitive decline is an issue currently under intense scrutiny, as it has long been recognised that silent cerebral infarcts can more than double the risk of dementia<sup>12</sup>. Indeed the concept of post-operative cognitive dysfunction and its relationship with DW-MRI has been described following valvular surgery, bypass grafting and left heart catheterization<sup>13</sup>.

The Boston Scientific Lotus valve is a novel TAVI iteration that incorporates a number of features specifically designed to improve upon first-generation devices<sup>14</sup>. As such it exhibits superior deployment success rates when compared to the older Medtronic CoreValve<sup>15,16</sup>. However, the key concern of silent cerebral injury following implantation and cognitive decline remains unanswered. We sought to characterise the extent of new silent cerebral infarction using DW-MRI, and investigate

1  
2  
3 longitudinally cognitive function following TAVI with the first generation self-  
4 expanding Medtronic CoreValve and the second-generation mechanically-expanded  
5 Boston Scientific Lotus valve.  
6  
7  
8  
9

## 10 **METHODS**

### 11 **Patient selection**

12  
13 This study prospectively recruited 74 patients with severe degenerative AS from two  
14 large UK tertiary cardiothoracic centres (Leeds and Leicester) who were referred for  
15 TAVI between April 2012 and May 2015. Severe AS was classified by  
16 echocardiography as an aortic valve area of  $\leq 1.0\text{cm}^2$  or peak velocity  $>4\text{m/s}$ . The  
17 decision for TAVI in all cases was taken by a multidisciplinary heart team in  
18 accordance with international guidance<sup>17</sup>. Exclusion criteria included any  
19 contraindication to MRI or pre-existing severe cognitive impairment (a mini-mental  
20 state examination (MMSE) score  $<10$ ). Any patient deemed to exhibit new focal  
21 neurological dysfunction consistent with clinical stroke post-TAVI was also excluded.  
22  
23 The study was approved by the National Research Ethics Service (08/H1307/106),  
24 complied with the Declaration of Helsinki and all patients provided written informed  
25 consent.  
26  
27  
28  
29  
30  
31  
32  
33  
34  
35  
36  
37  
38  
39

### 40 **Transcatheter Aortic Valve Implantation**

41 TAVI was performed using either a first-generation CoreValve system (Medtronic,  
42 Minneapolis, Minnesota, USA) or the Lotus™ Aortic Valve system (Boston Scientific  
43 Corporation, Natick, MA, USA) employing standard techniques as previously  
44 described for both vendors<sup>18,19</sup>. Multidetector computed tomography (MDCT) was  
45 employed to assist annular sizing and assess aortic calcification prior to TAVI.  
46 Percutaneous femoral artery access was the default approach. Balloon  
47 valvuloplasty, rapid ventricular pacing and post-dilatation (in the case of CoreValve)  
48  
49  
50  
51  
52  
53  
54  
55  
56  
57  
58  
59  
60

1  
2  
3 were employed at the discretion of the operator. All patients received weight-  
4 adjusted unfractionated heparin to maintain an activated clotting time >200s and  
5 were treated with dual antiplatelet therapy (aspirin 75mg and clopidogrel 75mg) for a  
6 minimum of 3 months. None of the TAVI cases involved the use of a cerebral  
7 protection device.  
8  
9  
10  
11  
12

### 13 **Neurocognitive assessment**

14  
15 The neurocognitive test battery was performed by trained assessors  
16 (medical/nursing) in a quiet comfortable environment at three Valve Academic  
17 Research Consortium (VARC) recommended time points (baseline, 30d and 12m)<sup>20</sup>.  
18 Training of assessors and performance validation was undertaken by an  
19 experienced neuropsychologist (CL). Follow-up assessment was conducted at the  
20 patient home or the hospital. Total assessment time ranged between 60-90min with  
21 appropriate rest periods. Baseline characteristics, patient handedness and years of  
22 education were recorded. The national adult reading test (NART) was used to  
23 calculate the full scale intelligent quotient (FSIQ=123.2-(1.029 x NART error score)).  
24 A broad battery of previously validated neurocognitive assessments were  
25 undertaken at the designated time points<sup>21</sup> and included evaluation of: *cognitive*  
26 *reasoning*: using the mini mental state examination (MMSE), *verbal memory*: using  
27 the Hopkins Verbal Learning Tests (HVLT), *executive function*: using the Letter  
28 Number Sequencing task (LNS), *psycho-motor speed*: using the Trail Making Test  
29 (TMT) A and B, *perceptual and visual memory*: using the Digit-Symbol Substitution  
30 Test (DSST), and *fine motor co-ordination and speed*: using the Grooved Pegboard  
31 Test (GPBT - Model 32025, Lafayette Instruments Co, IN, USA). Cognitive decline  
32 was defined as a reduction of the score by 1 SD of the baseline score for all tests<sup>22-</sup>  
33  
34  
35  
36  
37  
38  
39  
40  
41  
42  
43  
44  
45  
46  
47  
48  
49  
50  
51  
52  
53

54  
55  
56  
57  
58  
59  
60

24 .

### Cerebral MRI

Cerebral MRI was conducted pre- and post-procedure (within 7d) using identical imaging protocols. MRI was performed on the same 1.5T system for all serial scans for any individual patient (Intera, Phillips Healthcare, Best, The Netherlands or Avanto, Siemens Medical Systems, Erlangen, Germany). The imaging protocol consisted of T2 weighted fast field echo, T2 turbo field echo and diffusion weighted imaging (DWI) (22 slices, 5mm thick, 1mm gap, FOV 350, RFOV 100). Each scan was independently assessed by two experienced Neuroradiologists (AG, MI), blinded to all clinical/procedural details. Cerebral embolism or micro-infarction was defined as a new restricted diffusion lesion on DWI. New cerebral micro-infarcts were localised to one hemisphere and vascular territory. Infarct diameter was used to categorise patients into small or large lesion sub-groups (<5mm or >5mm; in the case of multiple lesions the largest lesion was used to determine status). The total infarct volume (ml) was measured off-line using standard post-processing software (QMass 7.2, Medis, The Netherlands) as previously published<sup>10,11</sup>.

**Statistical Analysis** Data was tested for normality using the Shapiro-Wilks test. Continuous variables were expressed as mean±SD or median (Q2-Q3 or IQR) and were tested for differences by means of a 2-sided, unpaired Student t test (for comparison between groups) or a 2-sided, paired Student t test (for intra-group comparison). Non-parametric testing (Mann–Whitney test) was performed where indicated. Categorical variables were given as frequencies and percentages and compared by  $\chi^2$  statistics or Fisher exact test. All statistical analyses were performed using the PASW software package (V.21.0 SPSS, IBM, Chicago, Illinois, USA) with a two-sided significance level of  $p < 0.05$  was considered statistically significant. Sample size to detect cognitive decline (reduction in score by 1SD) was estimated using *IBM*

1  
2  
3 *SPSS Sample power version 3*, and using normative data for the test to have 80%  
4 power ( $\alpha$  0.05), a minimum of 17 patients were required in each group.  
5

## 6 **RESULTS**

### 7 **Patient population**

8  
9  
10 A total of 66 patients (37 Medtronic CoreValve and 29 Boston Lotus) underwent both  
11 the pre-operative (median 1 day pre-procedure, IQR 14 days) and immediate post-  
12 TAVI MRI scans (median 4 days, IQR 4 days). The baseline characteristics of these  
13 groups are shown in Table 1. Forty-nine of these (24 CoreValve and 25 Lotus)  
14 completed serial neurocognitive assessments out to 12 months. Reasons for non-  
15 completion were varied reflecting an elderly frail population (Figure 1).  
16  
17  
18  
19  
20  
21  
22  
23

### 24 **Patient Involvement**

25  
26 Patients were not involved with the study design, recruitment, conduct or  
27 interpretation of results obtained. Outcome measures were objectively measured  
28 and not based on patient experience.  
29  
30  
31

### 32 **Procedural data**

33  
34 TAVI was successful in all cases. Catheterization data for the TAVI implant  
35 procedures is summarised in Table 2. Of the 29 Lotus implants, 7(24%) involved  
36 device repositioning. Of the CoreValve implants, there were three instances of  
37 embolization and the requirement of a second valve in three cases (two of whom  
38 were due to embolization).  
39  
40  
41  
42  
43  
44

### 45 **Cerebral MRI**

46  
47 Typical cerebral DWI images at baseline and immediately after TAVI are depicted in  
48 Figures 2A and 2B respectively.  
49

50  
51 *Baseline:* At baseline, 5(17%) of the Lotus patients and 10(27%) of the CoreValve  
52 patients had evidence of pre-existing established stroke ( $p=0.346$ ) with equivalent  
53 lesion volume ( $p=0.529$ ). There was also evidence of recent micro-infarction on  
54  
55  
56  
57  
58  
59  
60

1  
2  
3 cerebral DWI in 2(7%) Lotus and 4(11%) CoreValve patients ( $p=0.583$ ). A greater  
4  
5 proportion of patients undergoing Lotus TAVI had evidence of periventricular  
6  
7 ischaemia compared to those undergoing CoreValve (19(66%) vs. 14(38%),  
8  
9  $p=0.026$ ).

11 *Post-procedure:* Table 3 summarises the findings of DWI imaging following TAVI.  
12  
13 There was a significantly greater incidence in new micro-infarction observed  
14  
15 following Lotus TAVI with a greater number of new infarcts per patient. These were  
16  
17 predominantly of small size, with a comparable mean infarcted cerebral tissue  
18  
19 volume per patient with both TAVI designs. More patients suffered new anterior and  
20  
21 vertebro-basilar lesions following Lotus than CoreValve. The number of new lesions  
22  
23 following Lotus repositioning ( $n=7$ ) and non-repositioning ( $n=22$ ) did not differ (1.0  
24  
25 (IQR 8.0) vs. 3.0 (IQR 3.75),  $p=0.438$ ) and Lotus repositioning did not correlate with  
26  
27 number of new lesions ( $p=0.435$ ). For the CoreValve group, the three patients in  
28  
29 whom embolization occurred had significantly greater frequency of new lesions post-  
30  
31 procedure (4.0 (IQR 0.0) vs. 1.0 (IQR 2.0),  $p=0.011$ ), but no difference was seen in  
32  
33 the three requiring a second valve (4.0 (IQR 0.0) vs. 1.0 (IQR 2.0),  $p=0.148$ ). Typical  
34  
35 findings of new cerebral infarction detected by DW-MRI post-TAVI are exemplified in  
36  
37 Figure 2.

#### 41 **Baseline education and intelligence**

42  
43 The vast majority of patients were right handed (CoreValve: 21(88%) vs. Lotus:  
44  
45 24(96%),  $p=0.234$ ) with equivalent reporting of disability on Modified Rankin Scale  
46  
47 (CoreValve:  $1.9\pm 1.1$  vs. Lotus:  $2.0\pm 0.7$ ,  $p=0.929$ ). The CoreValve and Lotus patients  
48  
49 were similar in respect of years in education ( $10.9\pm 1.9$  vs.  $11.6\pm 2.5$  yrs,  $p=0.279$ ),  
50  
51 and full scale IQ ( $106\pm 12$  vs.  $102\pm 15$ ,  $p=0.313$ ). Global cognition measured using the  
52  
53 MMSE was also equivalent ( $28.8\pm 1.8$  vs.  $28.6\pm 1.6$ ,  $p=0.279$ ) with only 1 patient from  
54  
55  
56  
57  
58  
59  
60



1  
2  
3 the Lotus group indicating cognitive impairment (defined as an MMSE of less than  
4  
5 24<sup>25</sup>).

### 7 **Effect of TAVI design on absolute neurocognitive function scores**

8  
9 Neurocognitive performance, prior to and following Lotus and CoreValve TAVI, are  
10  
11 shown in Table 4. For the vast majority of domains, including global cognition,  
12  
13 psychomotor speed, executive function and fine motor co-ordination, no change in  
14  
15 test scores were observed at 30 days or 12 months following TAVI, with either the  
16  
17 Lotus or CoreValve prostheses.

18  
19 The HVLIT was utilised to test mnemonic function and verbal memory, and total  
20  
21 learning scores remained unchanged over time for both CoreValve and Lotus.  
22  
23 However, delayed recall scores and discrimination index were significantly lower at  
24  
25 30 days following Lotus (Table 4), with 12 month scores returning to baseline level  
26  
27 (delayed recall: 7.6±3.0 vs. 9.0±6.7, p=0.320, discrimination index: 10.2±1.5 vs.  
28  
29 10.1±2.4, p=0.867), with no change observed following CoreValve.

30  
31 The TMT assesses executive function and psychomotor speed, with TMT A  
32  
33 preceding the more challenging TMT B. The TMT B scores were significantly lower  
34  
35 at 30 days following Lotus (Table 4), with 12 month scores again returning to  
36  
37 baseline level (170.9±86.5 vs. 152.3±87.5, p=0.215), with no change observed  
38  
39 following CoreValve at any time point.

### 40 **Presence or absence of DW-MRI lesions**

41  
42 At one-year follow-up, for each TAVI prosthesis we sought to compare individuals  
43  
44 with and without DW-MRI lesions in respect of neurocognitive performance (Table  
45  
46 5). Of the 25 Lotus patients that completed 12 month assessments, 19(76%)  
47  
48 exhibited new DW-MRI lesions post-TAVI, and of the 24 CoreValve patients,  
49  
50 13(54%) were DW-MRI positive (p=0.140). Lotus patients with DW-MRI lesions  
51  
52  
53  
54  
55  
56  
57  
58  
59  
60

1  
2  
3 exhibited an overall decline in global cognition (MMSE) at 12 months compared to  
4 those without (Figure 3A and B). CoreValve patients with DW-MRI lesions had a  
5 significantly lower HVLT discrimination index at 12 months compared to those  
6 without (Figure 3C and D). For all of the remaining neurocognitive domains, no  
7 difference in performance at 1 year was noted between patients with and without  
8 DW-MRI lesions for either TAVI prosthesis.  
9  
10  
11  
12  
13  
14

## 15 **DISCUSSION**

16  
17 This two-centre study is the first to use DW-MRI and cognitive assessments to  
18 comprehensively compare two first- and second-generation TAVI devices. This study  
19 provides several new insights: 1) there was a high occurrence of silent cerebral  
20 embolism during TAVI affecting both first- and second-generation prosthesis designs  
21 (with 66% of the total study population exhibiting new DW-MRI lesions post-TAVI); 2)  
22 the Lotus valve exhibited a significantly higher incidence of new DW-MRI micro-  
23 infarcts, with more than twice the number of lesions per patient than observed  
24 following CoreValve; 3) DW-MRI lesions are of similar size, but more frequently  
25 observed in the anterior cerebral and vertebro-basilar territories following Lotus  
26 compared with CoreValve; 4) despite a higher DW-MRI burden and an initial  
27 deterioration in verbal memory following Lotus, TAVI does not appear detrimental to  
28 mid-term neurocognitive function, with 12 month scores in all domains being  
29 equivalent to baseline following both Lotus and CoreValve; 5) for the majority of  
30 domains, including executive function, psycho-motor speed, perceptual and visual  
31 memory and fine motor co-ordination and speed, the presence of DW-MRI lesions  
32 did not influence neurocognitive function at 1 year for either valve. This latter point is  
33 consistent with previous work that demonstrated preserved 2-year cognitive  
34 performance in an unselected TAVI population, irrespective of DW-MRI status<sup>23</sup>.  
35  
36  
37  
38  
39  
40  
41  
42  
43  
44  
45  
46  
47  
48  
49  
50  
51  
52  
53  
54  
55  
56  
57  
58  
59  
60

1  
2  
3 Cognitive decline after cardiac surgery is associated with increased morbidity and  
4 mortality<sup>26</sup> and has significant social and economic implications<sup>23</sup>. TAVI has  
5 revolutionised the management of high risk patients with symptomatic aortic stenosis  
6 worldwide. However, determining whether the high incidence of silent DW-MRI  
7 lesions seen post-TAVI predisposes to cognitive decline, and whether TAVI design  
8 has any impact upon this, remains a crucial pre-requisite to its more widespread use.  
9  
10 Despite its advanced design, our study suggests that the use of the second-  
11 generation Lotus valve carries a higher risk of silent cerebral infarction, but without  
12 an objectively discernible decline in neurocognitive function at one year, comparable  
13 to the CoreValve prosthesis.  
14  
15

16  
17  
18  
19  
20  
21  
22  
23  
24  
25 The multiple and diffusely distributed silent cerebral lesions detected by DW-MRI  
26 post-TAVI are in keeping with an embolic aetiology. We have previously shown  
27 severity of aortic arch atheroma is an independent risk factor for the development of  
28 new cerebral infarcts following TAVI<sup>10</sup>. Transcranial Doppler studies, performed  
29 during TAVI, have indicated balloon valvuloplasty, prosthesis positioning and  
30 implantation as particular moments for cerebral embolization<sup>27</sup>, suggesting that  
31 manipulation of the native aortic valve is also an important source.  
32  
33  
34  
35  
36  
37  
38  
39

40  
41 Oversizing has been associated with tissue embolization on histopathological  
42 analysis<sup>28</sup> and is recommended to a degree with first-generation designs in order to  
43 prevent paravalvular regurgitation. The higher cover index and greater displacement  
44 forces upon degenerate native leaflets might consequently be expected to precipitate  
45 a greater degree of tissue dehiscence and embolization. Balloon post-dilatation has  
46 also been demonstrated to significantly predict acute neurological events<sup>7</sup>. Despite  
47 the larger valve size, greater frequency of valve embolization and use of post-  
48 dilatation, new DW-MRI lesions were less frequently seen following CoreValve. The  
49  
50  
51  
52  
53  
54  
55  
56  
57  
58  
59  
60

1  
2  
3 Lotus valve is fully repositionable, reflecting the longer fluoroscopy times observed  
4 with this prosthesis. However, our data suggests that repositioning per se was not a  
5 significant contributor to the frequency of new DW-MRI lesions observed. The Lotus  
6 delivery system typically requires 20F sheaths or wider, and thus greater endothelial  
7 disruption during manipulation around the aortic arch may underlie the higher  
8 incidence of cerebral micro-infarction seen after Lotus TAVI. Future studies are  
9 required to determine whether these findings may translate into variation in the  
10 incidence of clinical stroke.  
11  
12

13  
14 We and others have previously demonstrated the majority of DW-MRI lesions  
15 immediately post-TAVI appear to resolve by 6 months<sup>11</sup>. However, this resolution  
16 does not necessarily indicate tissue normalisation. The insensitivity of lower field  
17 strength imaging has been suggested as one explanation<sup>13</sup>. Furthermore, rat models  
18 of cerebral ischaemic insult confirm histological neuronal damage despite DW-MRI  
19 resolution, cautioning the use of imaging alone to assess ischaemic injury<sup>29</sup>. We  
20 therefore sought to compliment cerebral MR imaging with a battery of well validated  
21 neurocognitive assessment tools.  
22  
23

24  
25 There is a large body of evidence to indicate silent cerebral injury heralds adverse  
26 cognitive consequences. They are associated with an increased risk of mild cognitive  
27 impairment<sup>30</sup>, and may double the risk of dementia (most commonly Alzheimer's  
28 disease), with a steeper rate of cognitive decline observed the greater the number of  
29 infarctions<sup>12</sup>. It is feasible that the decline in verbal memory seen at 30 days  
30 following Lotus, which was not observed following CoreValve, is a reflection of the  
31 associated higher burden of DW-MRI lesions.  
32  
33

34  
35 To date, few studies have combined DW-MRI and cognitive assessment following  
36 TAVI with CoreValve or Edwards-Sapien. The largest involved 111 subjects<sup>23</sup> with  
37  
38  
39  
40  
41  
42  
43  
44  
45  
46  
47  
48  
49  
50  
51  
52  
53  
54  
55  
56  
57  
58  
59  
60

1  
2  
3 the other three averaging 40 patients<sup>8,22,31</sup>. No decline in any cognitive domain was  
4  
5 observed despite the occurrence of diffuse micro-infarcts affecting both cerebral  
6  
7 hemispheres<sup>22</sup>; and patients with and without DW-MRI lesions performed equally  
8  
9 well<sup>23</sup>. These findings are consistent with our study. Our observed high incidence of  
10  
11 new DW-MRI lesions post-TAVI appeared to lack clinical sequelae when cognition  
12  
13 was objectively assessed at 12 months, and this was the case following both first  
14  
15 and second-generation devices.  
16

17  
18 This study is noteworthy in the context of contemporary TAVI trials. Results from the  
19  
20 PARTNER 2 trial have suggested transfemoral TAVI results in a lower rate of death  
21  
22 or disabling stroke in intermediate-risk patients, with an average age similar to this  
23  
24 study of 81.5 years, when compared with surgery<sup>32</sup>. Younger patients would  
25  
26 expectedly exhibit lower burdens of aortic atheroma and thus fewer silent DW-MRI  
27  
28 lesions, irrespective of TAVI design. In the recent CLEAN-TAVI<sup>33</sup> and SENTINEL<sup>34</sup>  
29  
30 trials, cerebral protection reduced new ischaemic cerebral lesions. However, Lotus  
31  
32 patients were notably absent from both studies. Whilst pre-existing lesion volume  
33  
34 predicted future cerebral lesion volume<sup>34</sup>, the baseline and post-TAVR volume of  
35  
36 established DWI lesions in our study of both CoreValve and Lotus were equivalent.  
37  
38 Our work suggests devices to reduce lesion frequency maybe a particularly pertinent  
39  
40 adjunct to Lotus TAVI and potentially offset the decline in verbal memory and  
41  
42 psychomotor speed we observed at 30 days.  
43  
44

45  
46 Whilst our work indicates DW-MRI, our lesions does not seem to affect mid-term  
47  
48 neurocognitive function caution is required not to dismiss DW-MRI lesions as entirely  
49  
50 innocuous, particularly given even small lesions tripled the risk of stroke-related  
51  
52 death in healthy subjects aged 50 – 73 years over 14 years of follow-up<sup>35</sup>. Longer  
53  
54  
55  
56  
57  
58  
59  
60

1  
2  
3 follow-up is required to clinically appreciate the natural history of cerebral injury  
4  
5 incurred during TAVI.

### 6 7 **Limitations**

8  
9  
10 Patients were not randomised to CoreValve or Lotus and hence the study is  
11  
12 vulnerable to selection bias. Furthermore, we have not directly compared cognitive  
13  
14 performance from our two TAVI groups with that of healthy octogenarians, or  
15  
16 patients managed conservatively.

17  
18  
19 There was attrition in patients completing the study protocol, with 5 patients failing to  
20  
21 complete post-intervention imaging and 17 patients with imaging data failing to  
22  
23 complete 12 month neurocognitive assessments. Fourteen patients (19%) withdrew  
24  
25 from the study and this was often due to deteriorating health or transfer into long-  
26  
27 term nursing care. There is hence an inherent risk of bias as potentially those with  
28  
29 most marked decline in cognitive function might have been excluded. Furthermore,  
30  
31 our final analysed patient group sizes confer limited power to report 'no difference' in  
32  
33 baseline variables raising the possibility of Type 1 and Type 2 errors, and transfer  
34  
35 bias influencing our final group comparisons.

36  
37  
38  
39 The CoreValve has been clinically in use for much longer than the Lotus valve.  
40  
41 Therefore, the greater degree of new DWI lesion seen in the Lotus group may partly  
42  
43 reflect an operator "learning curve" during which experience and fluency in use of  
44  
45 Lotus delivery equipment was refined.

46  
47  
48 Presently, there is no internationally accepted definition of cognitive decline following  
49  
50 cardiac procedures, with the potential for variation between studies. We have utilised  
51  
52 a comprehensive battery of validated tests that cover a wide variety of important  
53  
54 higher neurocognitive faculties, but potentially these may be insensitive to change  
55  
56  
57  
58  
59  
60

1  
2  
3 and lack validation in the context of TAVI.  
4

5 Patients in atrial fibrillation on formal anticoagulation had their warfarin withheld prior  
6 to, with full dose heparin during the TAVI implant and recommencement of warfarin  
7 on the evening of the procedure. However, it is not possible to exclude cardiac  
8 thrombus associated with atrial fibrillation as a potential contributor to micro-  
9 infarction.  
10  
11  
12  
13  
14  
15

16 Our work employed 1.5 Tesla field strength imaging, which is the case for the  
17 majority of similar published studies. However, the use of higher-field strengths may  
18 have increased detection of micro-infarction and characterise more accurately the  
19 burden associated with different TAVI devices.  
20  
21  
22  
23  
24  
25

## 26 **CONCLUSION**

27  
28  
29 There was a higher incidence of silent micro-infarction with a greater number of  
30 lesions per patient following second-generation Lotus compared to the first-  
31 generation CoreValve implantation. However, there was no objective decline in  
32 neurocognitive function discernible 1-year following TAVI with either prosthesis.  
33  
34  
35  
36  
37

## 38 **FUNDING**

39  
40  
41 This study was part-funded by the British Heart Foundation (PG/11/126/29321), an  
42 investigator research grant from Boston Scientific and also the National Institute for  
43 Health Research (NIHR) Leeds Clinical Research Facility. The views expressed are  
44 those of the author(s) and not necessarily those of the NHS, NIHR or the  
45 Department of Health. GPM is supported by an NIHR Clinical Research Fellowship.  
46  
47  
48  
49  
50  
51

## 52 **COMPETING INTERESTS**

53  
54  
55 DB and CJM are consultants and proctors for both Medtronic and Boston Scientific.  
56  
57  
58  
59  
60

1  
2  
3 JG and SP have received an educational research grant from Philips Healthcare.  
4

5  
6 **AUTHOR'S CONTRIBUTION**  
7

8 JG conceived and designed the study. TAM drafted the manuscript. CL compiled the  
9 comprehensive battery of neurocognitive tests and instructed on their correct  
10 implementation. FR, TAM, AU, LED and AS performed the recruitment of patients  
11 and their neurocognitive assessment. GPM supervised and AS oversaw the  
12 University of Leicester contribution. MI and AJPG performed MRI image analysis.  
13 DJB and CM carried out TAVI implantation. TAM and AU analysed data and  
14 interpreted the results. PPS and PG gave input into data interpretation. PPS, PG,  
15 JRJF, GJF, SP and GPM were involved in critical and intellectual revision of the  
16 article. All authors edited and revised the manuscript. All authors read and approved  
17 the final manuscript.  
18  
19  
20  
21  
22  
23  
24  
25  
26  
27  
28  
29  
30  
31

32 **DATA SHARING STATEMENT**  
33

34 All clinically important data from this observational study has been reported on in the  
35 manuscript.  
36  
37  
38  
39  
40  
41  
42  
43  
44  
45  
46  
47  
48  
49  
50  
51  
52  
53  
54  
55  
56  
57  
58  
59  
60



## REFERENCES

1. Joint Task Force on the Management of Valvular Heart Disease of the European Society of C, European Association for Cardio-Thoracic S, Vahanian A, Alfieri O, Andreotti F, Antunes MJ, Baron-Esquivias G, Baumgartner H, Borger MA, Carrel TP, De Bonis M, Evangelista A, Falk V, Lung B, Lancellotti P, Pierard L, Price S, Schafers HJ, Schuler G, Stepinska J, Swedberg K, Takkenberg J, Von Oppell UO, Windecker S, Zamorano JL, Zembala M. Guidelines on the management of valvular heart disease (version 2012). *European heart journal* 2012;33:2451-2496.
2. Nishimura RA, Otto CM, Bonow RO, Carabello BA, Erwin JP, 3rd, Guyton RA, O'Gara PT, Ruiz CE, Skubas NJ, Sorajja P, Sundt TM, 3rd, Thomas JD, American College of Cardiology/American Heart Association Task Force on Practice G. 2014 AHA/ACC guideline for the management of patients with valvular heart disease: executive summary: a report of the American College of Cardiology/American Heart Association Task Force on Practice Guidelines. *Journal of the American College of Cardiology* 2014;63:2438-2488.
3. Fairbairn TA, Meads DM, Hulme C, Mather AN, Plein S, Blackman DJ, Greenwood JP. The cost-effectiveness of transcatheter aortic valve implantation versus surgical aortic valve replacement in patients with severe aortic stenosis at high operative risk. *Heart* 2013;99:914-920.
4. Fairbairn TA, Meads DM, Mather AN, Motwani M, Pavitt S, Plein S, Blackman DJ, Greenwood JP. Serial change in health-related quality of life over 1 year after transcatheter aortic valve implantation: predictors of health outcomes. *Journal of the American College of Cardiology* 2012;59:1672-1680.
5. Leon MB, Smith CR, Mack MJ, Makkar RR, Svensson LG, Kodali SK, Thourani VH, Tuzcu EM, Miller DC, Herrmann HC, Doshi D, Cohen DJ, Pichard AD, Kapadia S, Dewey T, Babaliaros V, Szeto WY, Williams MR, Kereiakes D, Zajarias A, Greason KL, Whisenant BK, Hodson RW, Moses JW, Trento A, Brown DL, Fearon WF, Pibarot P, Hahn RT, Jaber WA, Anderson WN, Alu MC, Webb JG, Investigators P. Transcatheter or Surgical Aortic-Valve Replacement in Intermediate-Risk Patients. *The New England journal of medicine* 2016;374:1609-1620.
6. Leon MB, Smith CR, Mack M, Miller DC, Moses JW, Svensson LG, Tuzcu EM, Webb JG, Fontana GP, Makkar RR, Brown DL, Block PC, Guyton RA, Pichard AD, Bavaria JE, Herrmann HC, Douglas PS, Petersen JL, Akin JJ, Anderson WN, Wang D, Pocock S, Investigators PT. Transcatheter aortic-valve implantation for aortic stenosis in patients who cannot undergo surgery. *The New England journal of medicine* 2010;363:1597-1607.
7. Fearon WF, Kodali S, Doshi D, Fischbein MP, Yeung AC, Tuzcu EM, Rihal CS, Babaliaros V, Zajarias A, Herrmann HC, Brown DL, Mack M, Teirstein PS, Whisenant BK, Makkar R, Kapadia S, Leon MB, Investigators PT. Outcomes after transfemoral transcatheter aortic valve replacement: a comparison of the randomized PARTNER (Placement of AoRTic TraNscathetER Valves) trial with the NRCA (Nonrandomized Continued Access) registry. *JACC Cardiovascular interventions* 2014;7:1245-1251.
8. Kahlert P, Knipp SC, Schlamann M, Thielmann M, Al-Rashid F, Weber M, Johansson U, Wendt D, Jakob HG, Forsting M, Sack S, Erbel R, Eggebrecht H. Silent and apparent cerebral ischemia after percutaneous transfemoral aortic valve implantation: a diffusion-weighted magnetic resonance imaging study. *Circulation* 2010;121:870-878.
9. Ghanem A, Muller A, Nahle CP, Kocurek J, Werner N, Hammerstingl C, Schild HH, Schwab JO, Mellert F, Fimmers R, Nickenig G, Thomas D. Risk and fate of cerebral embolism after transfemoral aortic valve implantation: a prospective pilot study with diffusion-weighted magnetic resonance imaging. *Journal of the American College of Cardiology* 2010;55:1427-1432.
10. Fairbairn TA, Mather AN, Bijsterveld P, Worthy G, Currie S, Goddard AJ, Blackman DJ, Plein S, Greenwood JP. Diffusion-weighted MRI determined cerebral embolic infarction following transcatheter aortic valve implantation: assessment of predictive risk factors and the relationship to subsequent health status. *Heart* 2012;98:18-23.

- 1  
2  
3 **11.** Uddin A, Fairbairn TA, Djoukhader IK, Igra M, Kidambi A, Motwani M, Herzog B, Ripley  
4 DP, Musa TA, Goddard AJ, Blackman DJ, Plein S, Greenwood JP. Consequence of cerebral  
5 embolism after transcatheter aortic valve implantation compared with contemporary surgical  
6 aortic valve replacement: effect on health-related quality of life. *Circulation Cardiovascular*  
7 *interventions* 2015;8:e001913.
- 8 **12.** Vermeer SE, Prins ND, den Heijer T, Hofman A, Koudstaal PJ, Breteler MM. Silent brain  
9 infarcts and the risk of dementia and cognitive decline. *The New England journal of medicine*  
10 2003;348:1215-1222.
- 11 **13.** Meller SM, Baumbach A, Brickman AM, Lansky AJ. Clinical implications for diffusion-  
12 weighted MRI brain lesions associated with transcatheter aortic valve replacement.  
13 *Catheterization and cardiovascular interventions : official journal of the Society for Cardiac*  
14 *Angiography & Interventions* 2014;83:502-508.
- 15 **14.** Meredith IT, Walters DL, Dumonteil N, Worthley SG, Tchetché D, Manoharan G,  
16 Blackman DJ, Rioufol G, Hildick-Smith D, Whitbourn RJ, Lefevre T, Lange R, Muller R,  
17 Redwood S, Feldman TE, Alocco DJ, Dawkins KD. 1-Year Outcomes With the Fully  
18 Repositionable and Retrievable Lotus Transcatheter Aortic Replacement Valve in 120 High-  
19 Risk Surgical Patients With Severe Aortic Stenosis: Results of the REPRISE II Study. *JACC*  
20 *Cardiovascular interventions* 2016;9:376-384.
- 21 **15.** Gooley RP, Talman AH, Cameron JD, Lockwood SM, Meredith IT. Comparison of Self-  
22 Expanding and Mechanically Expanded Transcatheter Aortic Valve Prostheses. *JACC*  
23 *Cardiovascular interventions* 2015;8:962-971.
- 24 **16.** Musa TA, Uddin A, Dobson LE, Swoboda PP, Garg P, Foley JRJ, Malkin C, Plein S,  
25 Blackman DJ, Greenwood JP. Cardiovascular magnetic resonance assessment of 1st  
26 generation CoreValve and 2nd generation Lotus valves. *Journal of interventional cardiology*  
27 2018;31:391-399.
- 28 **17.** Vahanian A, Alfieri O, Al-Attar N, Antunes M, Bax J, Cormier B, Cribier A, De Jaegere P,  
29 Fournial G, Kappetein AP, Kovac J, Ludgate S, Maisano F, Moat N, Mohr F, Nataf P, Pierard  
30 L, Pomar JL, Schofer J, Tornos P, Tuzcu M, van Hout B, Von Segesser LK, Walther T,  
31 European Association of Cardio-Thoracic S, European Society of C, European Association  
32 of Percutaneous Cardiovascular I. Transcatheter valve implantation for patients with aortic  
33 stenosis: a position statement from the European Association of Cardio-Thoracic Surgery  
34 (EACTS) and the European Society of Cardiology (ESC), in collaboration with the European  
35 Association of Percutaneous Cardiovascular Interventions (EAPCI). *European heart journal*  
36 2008;29:1463-1470.
- 37 **18.** Piazza N, Grube E, Gerckens U, den Heijer P, Linke A, Luha O, Ramondo A, Ussia G,  
38 Wenaweser P, Windecker S, Laborde JC, de Jaegere P, Serruys PW. Procedural and 30-  
39 day outcomes following transcatheter aortic valve implantation using the third generation (18  
40 Fr) corevalve revalving system: results from the multicentre, expanded evaluation registry 1-  
41 year following CE mark approval. *EuroIntervention : journal of EuroPCR in collaboration with*  
42 *the Working Group on Interventional Cardiology of the European Society of Cardiology*  
43 2008;4:242-249.
- 44 **19.** Meredith IT, Hood KL, Haratani N, Alocco DJ, Dawkins KD. Boston Scientific Lotus  
45 valve. *EuroIntervention : journal of EuroPCR in collaboration with the Working Group on*  
46 *Interventional Cardiology of the European Society of Cardiology* 2012;8 Suppl Q:Q70-74.
- 47 **20.** Kappetein AP, Head SJ, Genereux P, Piazza N, van Mieghem NM, Blackstone EH, Brott  
48 TG, Cohen DJ, Cutlip DE, van Es GA, Hahn RT, Kirtane AJ, Krucoff MW, Kodali S, Mack  
49 MJ, Mehran R, Rodes-Cabau J, Vranckx P, Webb JG, Windecker S, Serruys PW, Leon MB.  
50 Updated standardized endpoint definitions for transcatheter aortic valve implantation: the  
51 Valve Academic Research Consortium-2 consensus document. *European heart journal*  
52 2012;33:2403-2418.
- 53 **21.** Hachinski V, Iadecola C, Petersen RC, Breteler MM, Nyenhuis DL, Black SE, Powers  
54 WJ, DeCarli C, Merino JG, Kalaria RN, Vinters HV, Holtzman DM, Rosenberg GA, Wallin A,  
55 Dichgans M, Marler JR, Leblanc GG. National Institute of Neurological Disorders and Stroke-  
56 Canadian Stroke Network vascular cognitive impairment harmonization standards. *Stroke; a*  
57 *journal of cerebral circulation* 2006;37:2220-2241.

- 1  
2  
3 **22.** Knipp SC, Kahlert P, Jokisch D, Schlamann M, Wendt D, Weimar C, Jakob H, Thielmann  
4 M. Cognitive function after transapical aortic valve implantation: a single-centre study with 3-  
5 month follow-up. *Interactive cardiovascular and thoracic surgery* 2013;16:116-122.
- 6 **23.** Ghanem A, Kocurek J, Sinning JM, Wagner M, Becker BV, Vogel M, Schroder T,  
7 Wolfsgruber S, Vasa-Nicotera M, Hammerstingl C, Schwab JO, Thomas D, Werner N,  
8 Grube E, Nickenig G, Muller A. Cognitive trajectory after transcatheter aortic valve  
9 implantation. *Circulation Cardiovascular interventions* 2013;6:615-624.
- 10 **24.** Zamvar V, Williams D, Hall J, Payne N, Cann C, Young K, Karthikeyan S, Dunne J.  
11 Assessment of neurocognitive impairment after off-pump and on-pump techniques for  
12 coronary artery bypass graft surgery: prospective randomised controlled trial. *Bmj*  
13 2002;325:1268.
- 14 **25.** Crum RM, Anthony JC, Bassett SS, Folstein MF. Population-based norms for the Mini-  
15 Mental State Examination by age and educational level. *Jama* 1993;269:2386-2391.
- 16 **26.** Roach GW, Kanchuger M, Mangano CM, Newman M, Nussmeier N, Wolman R,  
17 Aggarwal A, Marschall K, Graham SH, Ley C. Adverse cerebral outcomes after coronary  
18 bypass surgery. Multicenter Study of Perioperative Ischemia Research Group and the  
19 Ischemia Research and Education Foundation Investigators. *The New England journal of*  
20 *medicine* 1996;335:1857-1863.
- 21 **27.** Kahlert P, Al-Rashid F, Dottger P, Mori K, Plicht B, Wendt D, Bergmann L, Kottenberg E,  
22 Schlamann M, Mummel P, Holle D, Thielmann M, Jakob HG, Konorza T, Heusch G, Erbel R,  
23 Eggebrecht H. Cerebral embolization during transcatheter aortic valve implantation: a  
24 transcranial Doppler study. *Circulation* 2012;126:1245-1255.
- 25 **28.** Van Mieghem NM, El Faquir N, Rahhab Z, Rodriguez-Olivares R, Wilschut J, Ouhlous  
26 M, Galema TW, Geleijnse ML, Kappetein AP, Schipper ME, de Jaegere PP. Incidence and  
27 predictors of debris embolizing to the brain during transcatheter aortic valve implantation.  
28 *JACC Cardiovascular interventions* 2015;8:718-724.
- 29 **29.** Ringer TM, Neumann-Haefelin T, Sobel RA, Moseley ME, Yenari MA. Reversal of early  
30 diffusion-weighted magnetic resonance imaging abnormalities does not necessarily reflect  
31 tissue salvage in experimental cerebral ischemia. *Stroke; a journal of cerebral circulation*  
32 2001;32:2362-2369.
- 33 **30.** Sacco RL, Kasner SE, Broderick JP, Caplan LR, Connors JJ, Culebras A, Elkind MS,  
34 George MG, Hamdan AD, Higashida RT, Hoh BL, Janis LS, Kase CS, Kleindorfer DO, Lee  
35 JM, Moseley ME, Peterson ED, Turan TN, Valderrama AL, Vinters HV, American Heart  
36 Association Stroke Council CoCS, Anesthesia, Council on Cardiovascular R, Intervention,  
37 Council on C, Stroke N, Council on E, Prevention, Council on Peripheral Vascular D, Council  
38 on Nutrition PA, Metabolism. An updated definition of stroke for the 21st century: a  
39 statement for healthcare professionals from the American Heart Association/American  
40 Stroke Association. *Stroke; a journal of cerebral circulation* 2013;44:2064-2089.
- 41 **31.** Rodes-Cabau J, Dumont E, Boone RH, Larose E, Bagur R, Gurvitch R, Bedard F, Doyle  
42 D, De Larochelliere R, Jayasuria C, Villeneuve J, Marrero A, Cote M, Pibarot P, Webb JG.  
43 Cerebral embolism following transcatheter aortic valve implantation: comparison of  
44 transfemoral and transapical approaches. *Journal of the American College of Cardiology*  
45 2011;57:18-28.
- 46 **32.** Leon MB, Smith CR, Mack MJ, Makkar RR, Svensson LG, Kodali SK, Thourani VH,  
47 Tuzcu EM, Miller DC, Herrmann HC, Doshi D, Cohen DJ, Pichard AD, Kapadia S, Dewey T,  
48 Babaliaros V, Szeto WY, Williams MR, Kereiakes D, Zajarias A, Greason KL, Whisenant BK,  
49 Hodson RW, Moses JW, Trento A, Brown DL, Fearon WF, Pibarot P, Hahn RT, Jaber WA,  
50 Anderson WN, Alu MC, Webb JG. Transcatheter or Surgical Aortic-Valve Replacement in  
51 Intermediate-Risk Patients. *The New England journal of medicine* 2016;374:1609-1620.
- 52 **33.** Haussig S, Mangner N, Dwyer MG, Lehmkühl L, Lucke C, Woitek F, Holzhey DM, Mohr  
53 FW, Gutberlet M, Zivadinov R, Schuler G, Linke A. Effect of a Cerebral Protection Device on  
54 Brain Lesions Following Transcatheter Aortic Valve Implantation in Patients With Severe  
55 Aortic Stenosis: The CLEAN-TAVI Randomized Clinical Trial. *Jama* 2016;316:592-601.
- 56 **34.** Kapadia SR, Kodali S, Makkar R, Mehran R, Lazar RM, Zivadinov R, Dwyer MG,  
57 Jilaihawi H, Virmani R, Anwaruddin S, Thourani VH, Nazif T, Mangner N, Woitek F,  
58  
59

1  
2  
3 Krishnaswamy A, Mick S, Chakravarty T, Nakamura M, McCabe JM, Satler L, Zajarias A,  
4 Szeto WY, Svensson L, Alu MC, White RM, Kraemer C, Parhizgar A, Leon MB, Linke A,  
5 Investigators ST. Protection Against Cerebral Embolism During Transcatheter Aortic Valve  
6 Replacement. *Journal of the American College of Cardiology* 2017;69:367-377.

7 **35.** Windham BG, Deere B, Griswold ME, Wang W, Bezerra DC, Shibata D, Butler K,  
8 Knopman D, Gottesman RF, Heiss G, Mosley TH, Jr. Small Brain Lesions and Incident  
9 Stroke and Mortality: A Cohort Study. *Annals of internal medicine* 2015;163:22-31.

10  
11  
12  
13  
14  
15  
16  
17  
18  
19  
20  
21  
22  
23  
24  
25  
26  
27  
28  
29  
30  
31  
32  
33  
34  
35  
36  
37  
38  
39  
40  
41  
42  
43  
44  
45  
46  
47  
48  
49  
50  
51  
52  
53  
54  
55  
56  
57  
58  
59  
60

For peer review only

## TABLES

**Table 1** – Patient characteristics in those with 6 month follow up.

|                                    | Lotus (n=29) | CoreValve (n=37) | p Value*     |
|------------------------------------|--------------|------------------|--------------|
| Age (years)                        | 79.8±8.9     | 81.2±7.2         | 0.459        |
| Male, n (%)                        | 14 (48)      | 17 (46)          | 0.851        |
| EuroSCORE II                       | 4.13±3.30    | 5.55±3.79        | 0.115        |
| STS score (%)                      | 4.04±2.59    | 5.28±3.41        | 0.109        |
| BMI (kg/m <sup>2</sup> )           | 28.5±5.2     | 27.2±5.4         | 0.323        |
| Hypertension, n (%)                | 11 (38)      | 20 (54)          | 0.157        |
| Diabetes, n (%)                    | 5 (17)       | 4 (11)           | 0.450        |
| Hyperlipidaemia, n (%)             | 17 (59)      | 18 (49)          | 0.488        |
| Atrial Fibrillation, n (%)         | 5 (17)       | 9 (24)           | 0.449        |
| Previous MI, n (%)                 | 7 (24)       | 2 (5)            | <b>0.026</b> |
| Previous PCI, n (%)                | 9 (31)       | 10 (27)          | 0.774        |
| Previous CABG, n (%)               | 5 (17)       | 8 (22)           | 0.618        |
| Previous Stroke, n (%)             | 7 (24)       | 6 (16)           | 0.454        |
| Peripheral Vascular Disease, n (%) | 4 (14)       | 5 (14)           | 0.991        |
| eGFR (ml/min/1.73m <sup>2</sup> )  | 69±19        | 64±17            | 0.342        |

Values are mean±SD or n (%). \*p Value for comparison between procedure types.

STS, Society of Thoracic Surgeons score; BMI, body mass index; eGFR, estimated glomerular filtration rate; PCI, percutaneous coronary intervention; CABG, coronary artery bypass grafting; MI, myocardial infarction.

**Table 2** – Catheterization data for TAVI implant procedures

|                             | <b>Lotus (n=29)</b>                                 | <b>CoreValve (n=37)</b>                                               | <b>p Value*</b> |
|-----------------------------|-----------------------------------------------------|-----------------------------------------------------------------------|-----------------|
| TAVI size (n(%))            | 23mm (7 (24%))<br>25mm (8 (28%))<br>27mm (14 (48%)) | 23mm (4 (11%))<br>26mm (8 (22%))<br>29mm (18 (49%))<br>31mm (7 (19%)) | -               |
| Femoral route, n (%)        | 29 (100)                                            | 27 (73)                                                               | 0.081           |
| Sheath size (French)        | 18 (28%)<br>20 (52%)<br>22 (20%)                    | 18 (100%)                                                             |                 |
| Pullback PG (mmHg)          | 56±27                                               | 43±19                                                                 | <b>0.023</b>    |
| Fluoroscopy time (min)      | 29±8                                                | 18±11                                                                 | <b>0.001</b>    |
| Procedure time (min)        | 159±42                                              | 143±50                                                                | 0.194           |
| Contrast (ml)               | 120±43                                              | 134±43                                                                | 0.212           |
| Pre-dilatation BAV, n (%)   | 25 (86)                                             | 28 (77)                                                               | 0.286           |
| Post-dilatation, n (%)      | 0 (0)                                               | 5 (14)                                                                | <b>0.039</b>    |
| TAVI repositioned, n (%)    | 7 (24)                                              | 0 (0)                                                                 | <b>0.002</b>    |
| TAVI embolization, n (%)    | 0 (0)                                               | 3 (8)                                                                 | 0.117           |
| Need for second TAVI, n (%) | 0 (0)                                               | 3 (8)                                                                 | 0.117           |

\*Independent samples t-test

**Table 3** – Comparison of MRI DWI imaging following Boston Lotus and Medtronic CoreValve

|                                                | Lotus (n=29)    | CoreValve (n=37) | p Value      |
|------------------------------------------------|-----------------|------------------|--------------|
| Incidence of new micro-infarction (n(%))       | 23(79)          | 22(59)           | <b>0.025</b> |
| Number of new micro-infarcts per patient       | 3.5 (IQR 7.0)   | 2.0 (IQR 3.0)    | <b>0.002</b> |
| Mean micro-infarct volume per patient (ml)     | 0.36 (IQR 0.57) | 0.17 (IQR 0.21)  | 0.166        |
| Number of new small lesions (<5mm) (n(%))      | 124(78)         | 41(72)           | <b>0.005</b> |
| Number of new large lesions (≥5mm) (n(%))      | 34(22)          | 16(28)           | <b>0.036</b> |
| Number of patients with new ACA lesions (n(%)) | 14(48)          | 2(5)             | <b>0.001</b> |
| Number of patients with new MCA lesions (n(%)) | 20(69)          | 19(51)           | 0.149        |
| Number of patients with new PCA lesions (n(%)) | 10(34)          | 6(16)            | 0.086        |
| Number of patients with new VBA lesions (n(%)) | 15(52)          | 7(19)            | <b>0.005</b> |

ACA: anterior cerebral artery, MCA: middle cerebral artery, PCA: posterior cerebral artery,

VBA: vertebrobasilar artery.

**Table 4** – Summary of neurocognitive test scores at baseline, 30d and 12m.

|                           | TAVI           | Baseline    | 30 days     | p Value*     | 12 months   | p Value**    |
|---------------------------|----------------|-------------|-------------|--------------|-------------|--------------|
| <b>MMSE</b>               | Lotus          | 28.6±1.6    | 28.8±1.8    | 0.468        | 28.7±2.0    | 0.743        |
|                           | CoreValve      | 28.8±1.8    | 28.4±2.0    | 0.251        | 27.9±2.8    | 0.277        |
| <b>HVLT</b>               |                |             |             |              |             |              |
|                           | Total learning |             |             |              |             |              |
|                           | Lotus          | 21.4±7.2    | 21.5±4.1    | 0.913        | 23.3±6.1    | 0.104        |
|                           | CoreValve      | 17.7±6.3    | 18.6±6.1    | 0.512        | 18.3±7.8    | 0.764        |
| Delayed Recall            | Lotus          | 7.6±3.0     | 6.3±3.4     | <b>0.038</b> | 9.0±6.7     | <b>0.028</b> |
|                           | CoreValve      | 5.8±2.8     | 5.3±3.8     | 0.296        | 4.3±4.4     | 0.419        |
| Discrimination Index      | Lotus          | 10.2±1.5    | 8.6±2.9     | <b>0.015</b> | 10.1±2.4    | <b>0.010</b> |
|                           | CoreValve      | 9.6±2.1     | 9.1±3.4     | 0.373        | 7.9±4.5     | 0.147        |
| <b>Trail Making Tests</b> |                |             |             |              |             |              |
| A                         | Lotus          | 47.0±15.0   | 56.0±27.6   | 0.112        | 50.5±19.7   | 0.354        |
|                           | CoreValve      | 56.9±27.8   | 61.1±40.0   | 0.566        | 66.1±49.8   | 0.431        |
| B                         | Lotus          | 170.9±86.5  | 140.7±62.8  | <b>0.006</b> | 152.3±87.5  | 0.273        |
|                           | CoreValve      | 171.1±121.4 | 155.2±79.0  | 0.548        | 143.3±64.4  | 0.969        |
| <b>DSST</b>               | Lotus          | 43.2±15.8   | 45.5±16.0   | 0.254        | 44.2±13.5   | 0.253        |
|                           | CoreValve      | 33.9±14.1   | 34.6±13.3   | 0.704        | 34.4±15.7   | 0.633        |
| <b>LNS</b>                | Lotus          | 7.6±4.5     | 8.6±3.5     | 0.387        | 8.6±2.6     | 0.876        |
|                           | CoreValve      | 8.3±5.1     | 8.8±4.2     | 0.662        | 7.9±4.8     | 0.291        |
| <b>Grooved Pegboard</b>   |                |             |             |              |             |              |
| Dominant score            | Lotus          | 163.1±102.4 | 136.9±75.7  | 0.336        | 142.7±38.0  | 0.670        |
|                           | CoreValve      | 157.3±57.2  | 132.1±81.3  | 0.162        | 169.0±60.4  | 0.110        |
| Non-dominant score        | Lotus          | 158.0±37.7  | 148.5±53.4  | 0.373        | 159.6±47.0  | 0.658        |
|                           | CoreValve      | 180.9±58.2  | 173.9±104.2 | 0.654        | 215.9±124.4 | <b>0.004</b> |

Mean±SD.

\* comparing values at baseline and 30d, same TAVI design, paired samples t-test

\*\* comparing values at 30d and 12 months, same TAVI design, paired samples t-test



**Table 5** – Within group comparison of mean change in cognitive domain over 12 months in patients with and without DW-MRI lesions.

|                            | Boston Lotus (n=25) |                |              | Medtronic CoreValve (n=24) |               |              |
|----------------------------|---------------------|----------------|--------------|----------------------------|---------------|--------------|
|                            | DWI -ve (n=6)       | DWI +ve (n=19) | p Value      | DWI -ve (n=11)             | DWI+ve (n=13) | p Value      |
| <b>MMSE</b>                | 1.2±0.8             | -0.4±1.9       | <b>0.025</b> | -0.9±2.5                   | -0.7±2.6      | 0.840        |
| <b>HVLT Learning</b>       | 4.2±5.2             | 1.2±7.3        | 0.454        | 1.1±3.9                    | 1.0±9.1       | 0.691        |
| <b>HVLT Delayed</b>        | 6.3±12.9            | -0.1±3.3       | 0.177        | -0.2±2.5                   | -1.1±3.1      | 0.456        |
| <b>HVLT Discrimination</b> | 0.0±1.5             | -0.1±2.6       | 0.733        | 0.8±2.3                    | -2.3±3.5      | <b>0.019</b> |
| <b>TMT A</b>               | 15.5±20.8           | -0.1±15.3      | 0.059        | 18.9±64.9                  | 5.0±14.7      | 0.562        |
| <b>TMT B</b>               | -13.0±88.9          | -18.3±61.4     | 0.870        | 19.6±61.6                  | -1.4±64.4     | 0.454        |
| <b>DSST</b>                | 4.0±10.0            | -0.4±9.8       | 0.346        | -0.1±6.7                   | 5.0±13.7      | 0.370        |
| <b>LNS</b>                 | 2.4±3.0             | 0.7±5.1        | 0.534        | -0.5±5.0                   | 0.8±3.6       | 0.474        |
| <b>GPBT Dominant</b>       | -8.2±31.5           | -24.5±108.0    | 0.721        | 0.5±37.6                   | 22.6±37.7     | 0.186        |
| <b>GPBT Non-Dominant</b>   | -26.0±83.7          | -3.2±51.3      | 0.914        | 43.0±81.3                  | 20.8±66.8     | 0.235        |

Mean±SD.

1  
2  
3 **Figure 1:** Study Profile

4  
5 **Figure 2:** Diffusion weighted MRI of the brain examining silent injury with TAVI.

6  
7 Cerebral images, including the brainstem and cerebellum before (A) and after (B) TAVI  
8  
9 procedure. Multiple new cerebral infarctions were seen, some of which are highlighted by  
10  
11 the red arrows.  
12

13 **Figure 3:** Line graph depicting change in MMSE (A and B) and HVLT Discrimination Index

14 (C and D) over time following Lotus and CoreValve.

15  
16 (Red lines indicate patients with DW-MRI micro-infarcts, blue lines those without).  
17  
18  
19  
20  
21  
22  
23  
24  
25  
26  
27  
28  
29  
30  
31  
32  
33  
34  
35  
36  
37  
38  
39  
40  
41  
42  
43  
44  
45  
46  
47  
48  
49  
50  
51  
52  
53  
54  
55  
56  
57  
58  
59  
60

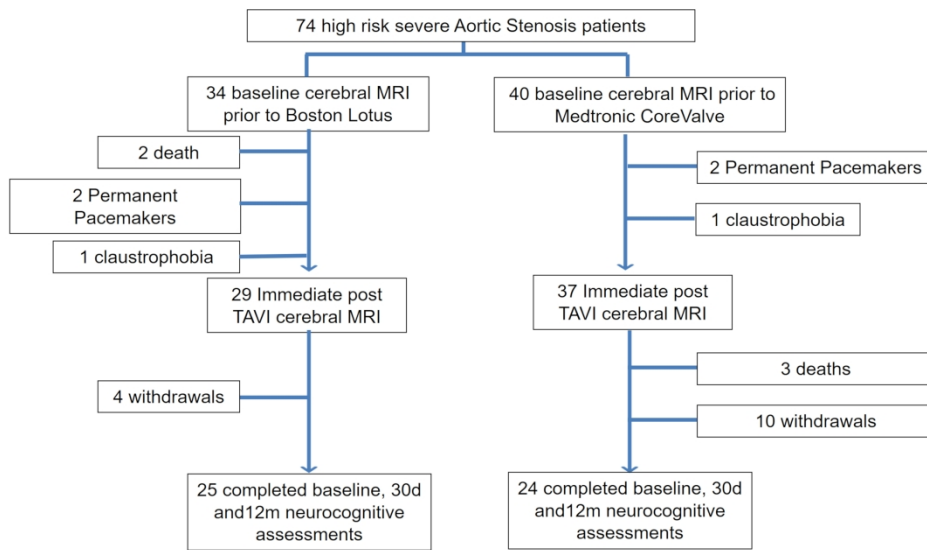

Study Profile

296x163mm (300 x 300 DPI)

1  
2  
3  
4  
5  
6  
7  
8  
9  
10  
11  
12  
13  
14  
15  
16  
17  
18  
19  
20  
21  
22  
23  
24  
25  
26  
27  
28  
29  
30  
31  
32  
33  
34  
35  
36  
37  
38  
39  
40  
41  
42  
43  
44  
45  
46  
47  
48  
49  
50  
51  
52  
53  
54  
55  
56  
57  
58  
59  
60

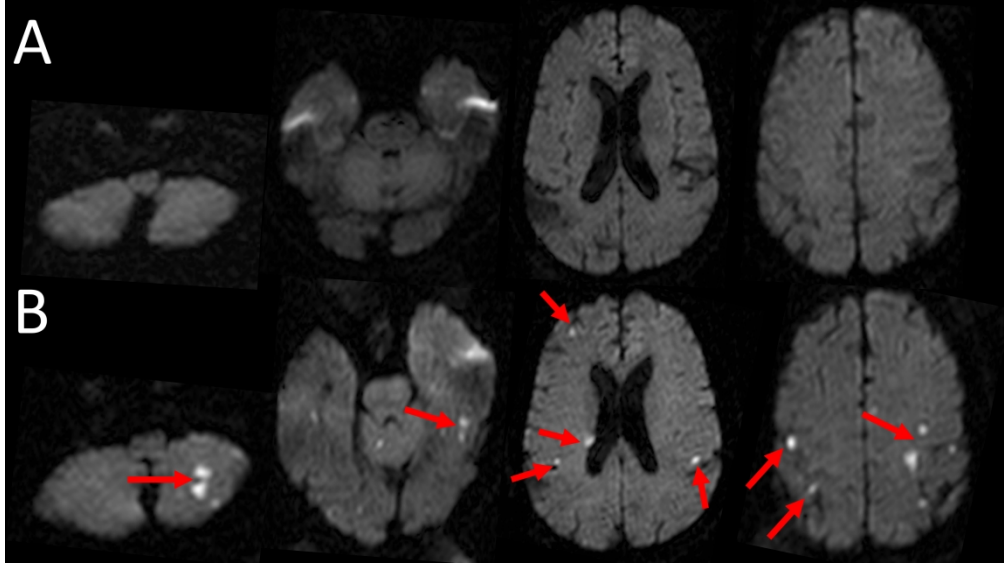

Figure 2: Diffusion weighted MRI of the brain examining silent injury with TAVI. Cerebral images, including the brainstem and cerebellum before (A) and after (B) TAVI procedure. Multiple new cerebral infarctions were seen, some of which are highlighted by the red arrows.

338x190mm (300 x 300 DPI)

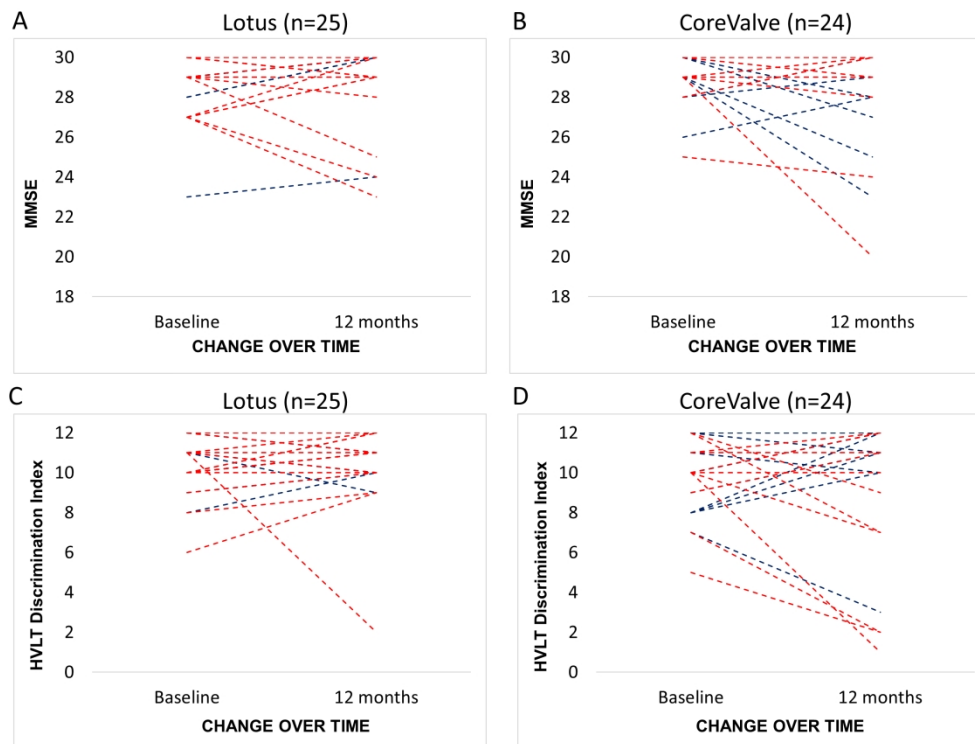

Figure 3: Line graph depicting change in MMSE (A and B) and HVL Discrimination Index (C and D) over time following Lotus and CoreValve. (Red lines indicate patients with DW-MRI micro-infarcts, blue lines those without).

254x190mm (300 x 300 DPI)

## STROBE Statement—checklist of items that should be included in reports of observational studies

|                              | Item No | Recommendation                                                                                                                                                                                                                                                                                                                                                                                                                                                                                                                                                                                                                                                                                   |
|------------------------------|---------|--------------------------------------------------------------------------------------------------------------------------------------------------------------------------------------------------------------------------------------------------------------------------------------------------------------------------------------------------------------------------------------------------------------------------------------------------------------------------------------------------------------------------------------------------------------------------------------------------------------------------------------------------------------------------------------------------|
| <b>Title and abstract</b>    | 1       | (a) Indicate the study's design with a commonly used term in the title or the abstract (pages 1 and 3)<br>(b) Provide in the abstract an informative and balanced summary of what was done and what was found (page 3)                                                                                                                                                                                                                                                                                                                                                                                                                                                                           |
| <b>Introduction</b>          |         |                                                                                                                                                                                                                                                                                                                                                                                                                                                                                                                                                                                                                                                                                                  |
| Background/rationale         | 2       | Explain the scientific background and rationale for the investigation being reported (page 6-7)                                                                                                                                                                                                                                                                                                                                                                                                                                                                                                                                                                                                  |
| Objectives                   | 3       | State specific objectives, including any prespecified hypotheses (pages 3, 7)                                                                                                                                                                                                                                                                                                                                                                                                                                                                                                                                                                                                                    |
| <b>Methods</b>               |         |                                                                                                                                                                                                                                                                                                                                                                                                                                                                                                                                                                                                                                                                                                  |
| Study design                 | 4       | Present key elements of study design early in the paper (pages 3, 7)                                                                                                                                                                                                                                                                                                                                                                                                                                                                                                                                                                                                                             |
| Setting                      | 5       | Describe the setting, locations, and relevant dates, including periods of recruitment, exposure, follow-up, and data collection (page 3, 7)                                                                                                                                                                                                                                                                                                                                                                                                                                                                                                                                                      |
| Participants                 | 6       | (a) <i>Cohort study</i> —Give the eligibility criteria, and the sources and methods of selection of participants. Describe methods of follow-up<br><i>Case-control study</i> —Give the eligibility criteria, and the sources and methods of case ascertainment and control selection. Give the rationale for the choice of cases and controls<br><i>Cross-sectional study</i> —Give the eligibility criteria, and the sources and methods of selection of participants<br>(b) <i>Cohort study</i> —For matched studies, give matching criteria and number of exposed and unexposed<br><i>Case-control study</i> —For matched studies, give matching criteria and the number of controls per case |
| Variables                    | 7       | Clearly define all outcomes, exposures, predictors, potential confounders, and effect modifiers. Give diagnostic criteria, if applicable (pages 8, 9)                                                                                                                                                                                                                                                                                                                                                                                                                                                                                                                                            |
| Data sources/<br>measurement | 8*      | For each variable of interest, give sources of data and details of methods of assessment (measurement). Describe comparability of assessment methods if there is more than one group (pages 8, 9)                                                                                                                                                                                                                                                                                                                                                                                                                                                                                                |
| Bias                         | 9       | Describe any efforts to address potential sources of bias (pages 9, 16)                                                                                                                                                                                                                                                                                                                                                                                                                                                                                                                                                                                                                          |
| Study size                   | 10      | Explain how the study size was arrived at (page 10)                                                                                                                                                                                                                                                                                                                                                                                                                                                                                                                                                                                                                                              |
| Quantitative variables       | 11      | Explain how quantitative variables were handled in the analyses. If applicable, describe which groupings were chosen and why (page 9)                                                                                                                                                                                                                                                                                                                                                                                                                                                                                                                                                            |
| Statistical methods          | 12      | (a) Describe all statistical methods, including those used to control for confounding (page 9)<br>(b) Describe any methods used to examine subgroups and interactions (page 9)<br>(c) Explain how missing data were addressed<br>(d) <i>Cohort study</i> —If applicable, explain how loss to follow-up was addressed<br><i>Case-control study</i> —If applicable, explain how matching of cases and controls was addressed<br><i>Cross-sectional study</i> —If applicable, describe analytical methods taking account of sampling strategy<br>(e) Describe any sensitivity analyses                                                                                                              |

Continued on next page

**Results**

|                  |     |                                                                                                                                                                                                                                                                                                                                                                                                               |
|------------------|-----|---------------------------------------------------------------------------------------------------------------------------------------------------------------------------------------------------------------------------------------------------------------------------------------------------------------------------------------------------------------------------------------------------------------|
| Participants     | 13* | (a) Report numbers of individuals at each stage of study—eg numbers potentially eligible, examined for eligibility, confirmed eligible, included in the study, completing follow-up, and analysed (Page 10, Figure 1)<br>(b) Give reasons for non-participation at each stage (Figure 1)<br>(c) Consider use of a flow diagram (Figure 1)                                                                     |
| Descriptive data | 14* | (a) Give characteristics of study participants (eg demographic, clinical, social) and information on exposures and potential confounders (Table 1 on page 23)<br>(b) Indicate number of participants with missing data for each variable of interest<br>(c) <i>Cohort study</i> —Summarise follow-up time (eg, average and total amount)                                                                      |
| Outcome data     | 15* | <i>Cohort study</i> —Report numbers of outcome events or summary measures over time<br><i>Case-control study</i> —Report numbers in each exposure category, or summary measures of exposure<br><i>Cross-sectional study</i> —Report numbers of outcome events or summary measures                                                                                                                             |
| Main results     | 16  | (a) Give unadjusted estimates and, if applicable, confounder-adjusted estimates and their precision (eg, 95% confidence interval). Make clear which confounders were adjusted for and why they were included<br>(b) Report category boundaries when continuous variables were categorized<br>(c) If relevant, consider translating estimates of relative risk into absolute risk for a meaningful time period |
| Other analyses   | 17  | Report other analyses done—eg analyses of subgroups and interactions, and sensitivity analyses                                                                                                                                                                                                                                                                                                                |

**Discussion**

|                  |    |                                                                                                                                                                                          |
|------------------|----|------------------------------------------------------------------------------------------------------------------------------------------------------------------------------------------|
| Key results      | 18 | Summarise key results with reference to study objectives (page 13)                                                                                                                       |
| Limitations      | 19 | Discuss limitations of the study, taking into account sources of potential bias or imprecision. Discuss both direction and magnitude of any potential bias (page 17)                     |
| Interpretation   | 20 | Give a cautious overall interpretation of results considering objectives, limitations, multiplicity of analyses, results from similar studies, and other relevant evidence (pages 14-16) |
| Generalisability | 21 | Discuss the generalisability (external validity) of the study results                                                                                                                    |

**Other information**

|         |    |                                                                                                                                                                         |
|---------|----|-------------------------------------------------------------------------------------------------------------------------------------------------------------------------|
| Funding | 22 | Give the source of funding and the role of the funders for the present study and, if applicable, for the original study on which the present article is based (page 18) |
|---------|----|-------------------------------------------------------------------------------------------------------------------------------------------------------------------------|

\*Give information separately for cases and controls in case-control studies and, if applicable, for exposed and unexposed groups in cohort and cross-sectional studies.

**Note:** An Explanation and Elaboration article discusses each checklist item and gives methodological background and published examples of transparent reporting. The STROBE checklist is best used in conjunction with this article (freely available on the Web sites of PLoS Medicine at <http://www.plosmedicine.org/>, Annals of Internal Medicine at <http://www.annals.org/>, and Epidemiology at <http://www.epidem.com/>). Information on the STROBE Initiative is available at [www.strobe-statement.org](http://www.strobe-statement.org).
